# Supplementary material for: Top-down and bottom-up controls on mountain-hopping erosion:insights from detrital 10 Be and river profile analysis in CentralGuatemala
Source: Copernicus journal article supplement (doi:10.5194/esurf-2020-80), 2020-11-09
Supplement: Supplementary file 1 [file esurf-2020-80-supplement.zip]

## Supplements to

### **“Top-down and bottom-up controls on mountain-hopping erosion: insights from detrital $^{10}\text{Be}$ and river profile analysis in Central Guatemala”**

By Gilles Y Brocard, Jane K Willenbring, Tristan Salles, Mickael Cosca, Axel Gutierrez, Noé Cacao Chiquín, Sergio Morán-Ical, Christian Teyssier

Content:

Supplement 1:  $^{40}\text{Ar}/^{39}\text{Ar}$  radiometric dating.

Supplement 2: Terrestrial  $^{10}\text{Be}$  measurements and conversion to erosion rates

Supplement 3: River profile segmentation

Supplement 4: River profile segment and knickpoint analysis

#### **Supplement 1. $^{40}\text{Ar}/^{39}\text{Ar}$ radiometric dating**

The crushed whole-rock samples were irradiated with standards in 3 separate irradiations at 0.5, 3, and 5 MWh, respectively, in the central thimble position of the USGS TRIGA reactor (Dalrymple et al., 1981), while being rotated at 1 rpm. Following irradiation, the samples and standards were loaded to a stainless steel sample holder with tweezers and then placed into a laser chamber with an externally pumped ZnSe window. The volume of the mostly stainless steel vacuum extraction line, including a cryogenic trap operated at  $-130^{\circ}\text{C}$  and two SAES™ GP50 getters (one operated at room temperature, one at 2.2A), is  $\sim 450\text{ cm}^3$ . A combination of turbo molecular pumps and ion pumps maintains steady pressures at  $< 1.33 \cdot 10^{-7}\text{ Pa}$  within the extraction line. Samples were incrementally heated in steps of 90 seconds, by controlled power output of a 50W  $\text{CO}_2$  laser equipped with a beam-homogenizing lens, which results in a uniform energy distribution over the entire sample surface. Any sample gas that was released during laser heating was exposed to the cryogenic trap and further purified for an additional 120 seconds by exposure to both the cryogenic trap and the SAES getters. The sample gas was expanded into a Thermo Scientific ARGUS VI™ mass spectrometer where argon isotopes were analyzed simultaneously using four faraday detectors ( $^{40}\text{Ar}$ ,  $^{39}\text{Ar}$ ,  $^{38}\text{Ar}$ ,  $^{37}\text{Ar}$ ) and an ion counter ( $^{36}\text{Ar}$ ). Detector calibration was carried out using a fixed reference voltage on the faraday detectors. The ion counter was calibrated relative to the faraday detectors by regular air pipette measurements, and the detector discrimination was monitored by the  $^{40}\text{Ar}/^{39}\text{Ar}$  ratios of Fish Canyon sanidine measurements. Following 10 minutes of data acquisition, time zero intercepts were fit to the data (using parabolic and/or linear best fits) and corrected for backgrounds, detector inter-calibrations, and nucleogenic interferences. The computer program Mass Spec (A. Deino, Berkeley Geochronology Center) was used for data acquisition, age calculations, and plotting. The  $^{40}\text{Ar}/^{39}\text{Ar}$  ages reported in Supplementary Table SI-x are calculated assuming an age of  $28.201 \pm 0.046\text{ Ma}$  for the Fish Canyon sanidine (Kuiper et al., 2008), using the decay constants of Min et al. (2000), and an atmospheric  $^{40}\text{Ar}/^{36}\text{Ar}$  of  $298.56 \pm 0.31$  (Lee et al., 2010). Laser fusion of more than ten individual Fish Canyon Tuff sanidine crystals at each closely monitored position within the irradiation package resulted in neutron flux ratios reproducible to  $\leq 0.25\%$  ( $2\sigma$ ). Isotopic production ratios were determined from irradiated  $\text{CaF}_2$  and  $\text{KCl}$  salts. For this study the following values were measured:  $(^{36}\text{Ar}/^{37}\text{Ar})\text{Ca} = (2.4 \pm 0.05)10^{-4}$ ;  $(^{39}\text{Ar}/^{37}\text{Ar})\text{Ca} = (6.59 \pm 0.10)10^{-4}$ ; and  $(^{38}\text{Ar}/^{39}\text{Ar})\text{K} = (1.29 \pm 0.03)10^{-2}$ . Cadmium shielding during irradiation prevented any measurable  $(^{40}\text{Ar}/^{39}\text{Ar})\text{K}$ . For the calculation of the plateau ages we required three or more consecutive heating steps that released  $\geq 50\%$  of the total  $^{39}\text{Ar}$  and also had statistically ( $2\sigma$ ) indistinguishable  $^{40}\text{Ar}/^{39}\text{Ar}$  ages.

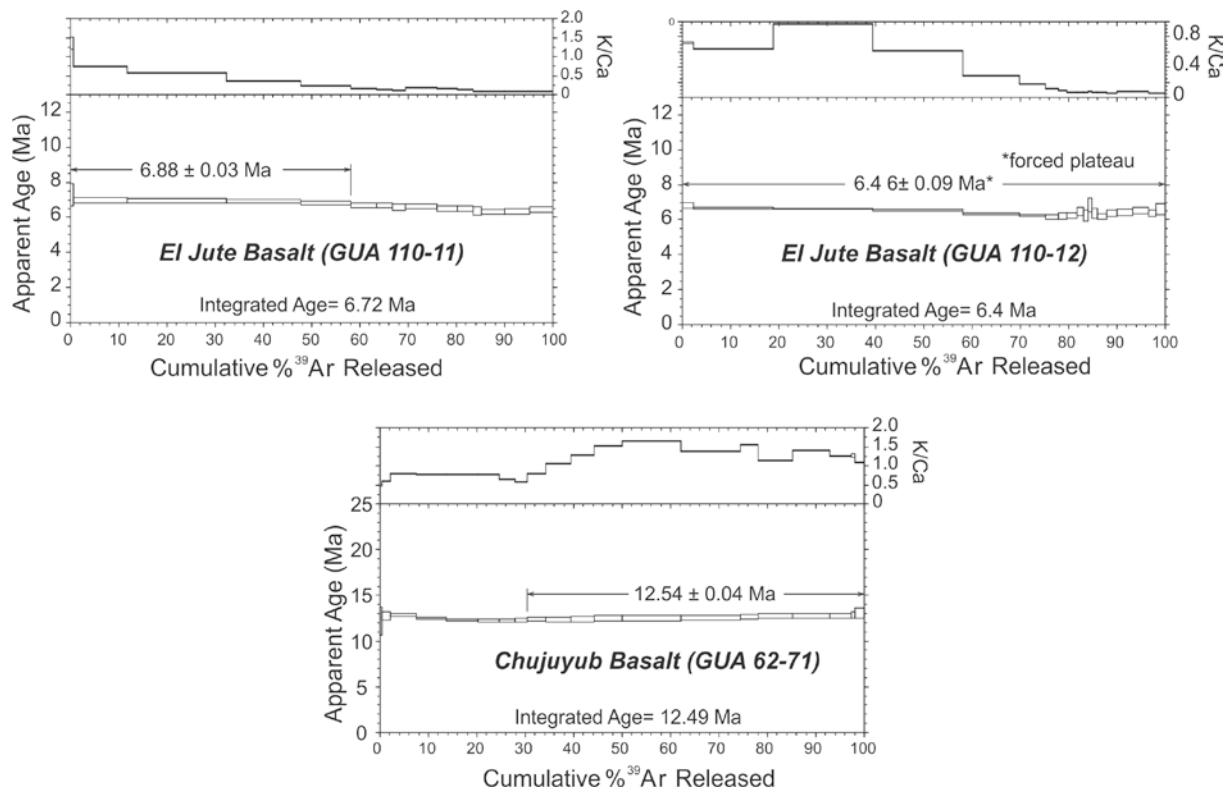

**Figure S1-1.** Heating step releases and statistics for the calculation of whole rock basalt <sup>40</sup>Ar/<sup>39</sup>Ar ages.

| Table S1-y. <sup>40</sup> Ar/ <sup>39</sup> Ar results                                                         |                                                      |                  |                  |                  |                  |                      |                    |       |                     |          |                 |      |        |       |      |       |      |
|----------------------------------------------------------------------------------------------------------------|------------------------------------------------------|------------------|------------------|------------------|------------------|----------------------|--------------------|-------|---------------------|----------|-----------------|------|--------|-------|------|-------|------|
| CO <sub>2</sub> laser                                                                                          | Relative Isotopic Abundances (x 10 <sup>-13</sup> A) |                  |                  |                  |                  |                      |                    |       |                     |          | Derived Results |      |        |       |      |       |      |
| Power                                                                                                          | <sup>40</sup> Ar                                     | <sup>39</sup> Ar | <sup>38</sup> Ar | <sup>37</sup> Ar | <sup>36</sup> Ar | <sup>39</sup> Ar Mol | <sup>39</sup> Ar % | Ca/K  | % <sup>40</sup> Ar* | Age (Ma) |                 |      |        |       |      |       |      |
| (Watts)                                                                                                        | ±1σ                                                  | ±1σ              | ±1σ              | ±1σ              | ±1σ              | of 10 <sup>-16</sup> | of total           | ±1σ   |                     | ±2σ      |                 |      |        |       |      |       |      |
|                                                                                                                |                                                      |                  |                  |                  |                  |                      |                    |       |                     |          |                 |      |        |       |      |       |      |
| GUA 62-71, whole rock, J ± 1σ = 1.1085 ± 0.001 (x10 <sup>-3</sup> ). Location: 91.04° E, 15.10°N               |                                                      |                  |                  |                  |                  |                      |                    |       |                     |          |                 |      |        |       |      |       |      |
| 0.9                                                                                                            | 46655.91                                             | 17.05            | 825.84           | 15.73            | 51.42            | 6.18                 | 465.42             | 5.24  | 140.68              | 0.56     | 4.0             | 0.4  | 2.098  | 0.045 | 11.0 | 12.17 | 0.76 |
| 1.2                                                                                                            | 75017.09                                             | 23.44            | 3309.56          | 15.93            | 69.89            | 6.52                 | 1522.25            | 5.29  | 181.79              | 0.52     | 16.2            | 1.8  | 1.713  | 0.010 | 28.7 | 12.68 | 0.24 |
| 1.5                                                                                                            | 98250.87                                             | 25.33            | 9999.04          | 18.18            | 139.19           | 6.31                 | 3413.50            | 6.01  | 111.91              | 0.43     | 49.0            | 5.3  | 1.271  | 0.003 | 66.8 | 12.81 | 0.07 |
| 1.8                                                                                                            | 92109.22                                             | 27.23            | 11596.99         | 18.16            | 154.17           | 6.45                 | 4045.85            | 6.11  | 63.62               | 0.34     | 56.8            | 6.2  | 1.300  | 0.003 | 80.2 | 12.43 | 0.05 |
| 2.1                                                                                                            | 105457.00                                            | 30.11            | 12412.77         | 19.07            | 165.06           | 6.24                 | 4296.59            | 5.95  | 95.42               | 0.40     | 60.8            | 6.6  | 1.290  | 0.003 | 73.8 | 12.24 | 0.05 |
| 2.3                                                                                                            | 77517.56                                             | 23.44            | 8411.71          | 17.05            | 124.33           | 6.18                 | 2936.32            | 5.73  | 86.14               | 0.40     | 41.2            | 4.5  | 1.301  | 0.004 | 67.7 | 12.17 | 0.07 |
| 2.5                                                                                                            | 61617.95                                             | 21.58            | 6167.51          | 15.82            | 66.12            | 6.18                 | 2571.49            | 5.33  | 79.50               | 0.39     | 30.2            | 3.3  | 1.554  | 0.005 | 62.4 | 12.17 | 0.08 |
| 2.7                                                                                                            | 51375.51                                             | 19.74            | 4588.29          | 14.88            | 87.22            | 6.38                 | 2166.49            | 5.79  | 77.52               | 0.37     | 22.5            | 2.4  | 1.761  | 0.007 | 56.0 | 12.23 | 0.10 |
| 3.0                                                                                                            | 99081.15                                             | 30.11            | 7134.81          | 16.68            | 131.35           | 6.24                 | 2423.34            | 5.96  | 183.60              | 0.57     | 35.0            | 3.8  | 1.267  | 0.004 | 45.6 | 12.35 | 0.12 |
| 3.3                                                                                                            | 152069.10                                            | 42.77            | 9897.57          | 18.14            | 182.67           | 6.05                 | 2518.24            | 5.53  | 304.28              | 0.79     | 48.5            | 5.3  | 0.949  | 0.003 | 41.1 | 12.32 | 0.14 |
| 3.6                                                                                                            | 147421.90                                            | 36.90            | 9051.87          | 16.65            | 182.18           | 6.45                 | 1890.86            | 5.54  | 306.24              | 0.73     | 44.4            | 4.8  | 0.780  | 0.003 | 38.8 | 12.33 | 0.15 |
| 4.0                                                                                                            | 178389.50                                            | 43.76            | 10855.54         | 17.88            | 229.76           | 6.18                 | 1927.31            | 5.19  | 370.39              | 0.79     | 53.2            | 5.8  | 0.663  | 0.002 | 38.8 | 12.44 | 0.15 |
| 5.0                                                                                                            | 363509.80                                            | 88.37            | 22586.24         | 24.62            | 440.98           | 6.32                 | 3680.93            | 6.13  | 744.05              | 1.19     | 110.7           | 12.0 | 0.608  | 0.001 | 39.7 | 12.45 | 0.14 |
| 6.0                                                                                                            | 351163.20                                            | 79.41            | 23249.66         | 25.50            | 428.22           | 6.39                 | 4523.01            | 6.13  | 684.77              | 1.09     | 113.9           | 12.4 | 0.727  | 0.001 | 42.6 | 12.54 | 0.13 |
| 6.0                                                                                                            | 103311.40                                            | 27.68            | 6941.79          | 15.85            | 132.28           | 6.04                 | 1202.92            | 5.34  | 198.48              | 0.65     | 34.0            | 3.7  | 0.653  | 0.003 | 43.4 | 12.60 | 0.13 |
| 7.0                                                                                                            | 196150.70                                            | 45.01            | 13191.02         | 18.71            | 270.91           | 5.91                 | 3083.53            | 6.13  | 374.66              | 0.84     | 64.7            | 7.0  | 0.881  | 0.002 | 43.8 | 12.70 | 0.13 |
| 8.0                                                                                                            | 221846.80                                            | 51.88            | 14539.20         | 19.31            | 293.01           | 6.11                 | 2744.21            | 5.95  | 432.72              | 0.90     | 71.3            | 7.7  | 0.711  | 0.002 | 42.5 | 12.66 | 0.13 |
| 9.0                                                                                                            | 120639.10                                            | 33.01            | 8257.42          | 16.40            | 195.17           | 5.76                 | 1769.90            | 5.73  | 227.08              | 0.65     | 40.5            | 4.4  | 0.809  | 0.003 | 44.6 | 12.71 | 0.13 |
| 10.0                                                                                                           | 21394.51                                             | 14.48            | 1577.50          | 14.49            | 83.58            | 6.03                 | 331.10             | 5.92  | 37.47               | 0.25     | 7.7             | 0.8  | 0.792  | 0.016 | 48.5 | 12.82 | 0.18 |
| 12.0                                                                                                           | 88021.11                                             | 26.28            | 3332.18          | 15.29            | 87.16            | 6.39                 | 823.69             | 5.67  | 223.26              | 0.61     | 16.3            | 1.8  | 0.933  | 0.008 | 25.2 | 12.97 | 0.28 |
| Age Plateau =12.54 ± 0.04 Ma (steps 4.0 - 12.0 watts, 100% <sup>39</sup> Ar released)                          |                                                      |                  |                  |                  |                  |                      |                    |       |                     |          |                 |      |        |       |      |       |      |
|                                                                                                                |                                                      |                  |                  |                  |                  |                      |                    |       |                     |          |                 |      |        |       |      |       |      |
|                                                                                                                |                                                      |                  |                  |                  |                  |                      |                    |       |                     |          |                 |      |        |       |      |       |      |
|                                                                                                                |                                                      |                  |                  |                  |                  |                      |                    |       |                     |          |                 |      |        |       |      |       |      |
| GUA 110-11, El Jute, whole rock, J ± 1σ = 1.1085 ± 0.001 (x10 <sup>-3</sup> ). Location: N 14.975 °, W 89.803° |                                                      |                  |                  |                  |                  |                      |                    |       |                     |          |                 |      |        |       |      |       |      |
| 0.9                                                                                                            | 6343.83                                              | 12.38            | 490.28           | 14.14            | 0.00             | 5.78                 | 97.01              | 5.04  | 15.32               | 0.18     | 2.4             | 0.7  | 0.748  | 0.043 | 28.8 | 7.29  | 0.32 |
| 1.2                                                                                                            | 63882.63                                             | 21.93            | 7995.93          | 16.92            | 133.81           | 6.31                 | 2882.06            | 5.76  | 121.40              | 0.47     | 39.2            | 11.2 | 1.363  | 0.004 | 44.5 | 6.94  | 0.07 |
| 1.5                                                                                                            | 100472.40                                            | 29.41            | 14679.32         | 19.48            | 247.64           | 6.04                 | 6674.09            | 7.15  | 167.19              | 0.63     | 71.9            | 20.6 | 1.719  | 0.003 | 51.7 | 6.92  | 0.06 |
| 1.8                                                                                                            | 71591.87                                             | 22.85            | 10970.59         | 17.92            | 152.85           | 5.85                 | 8035.82            | 7.96  | 115.47              | 0.50     | 53.8            | 15.4 | 2.771  | 0.006 | 53.9 | 6.87  | 0.06 |
| 2.1                                                                                                            | 45699.08                                             | 19.24            | 7341.83          | 16.12            | 94.90            | 5.97                 | 8734.57            | 7.77  | 72.35               | 0.33     | 36.0            | 10.3 | 4.502  | 0.011 | 55.8 | 6.80  | 0.05 |
| 2.3                                                                                                            | 22724.28                                             | 15.00            | 3804.11          | 15.99            | 35.91            | 6.10                 | 6300.06            | 7.13  | 35.97               | 0.26     | 18.6            | 5.3  | 6.268  | 0.026 | 57.0 | 6.67  | 0.06 |
| 2.5                                                                                                            | 13569.04                                             | 14.21            | 2357.50          | 15.17            | 32.37            | 6.52                 | 4867.93            | 6.70  | 21.07               | 0.20     | 11.6            | 3.3  | 7.817  | 0.049 | 59.0 | 6.65  | 0.08 |
| 2.7                                                                                                            | 11404.31                                             | 13.16            | 1956.86          | 15.14            | 27.25            | 6.10                 | 4707.41            | 6.13  | 18.65               | 0.19     | 9.6             | 2.7  | 9.109  | 0.068 | 57.3 | 6.55  | 0.09 |
| 3.0                                                                                                            | 32089.96                                             | 15.81            | 4611.48          | 16.12            | 78.32            | 6.10                 | 6950.11            | 7.42  | 59.19               | 0.34     | 22.6            | 6.5  | 5.708  | 0.020 | 48.5 | 6.60  | 0.07 |
| 3.3                                                                                                            | 20247.29                                             | 14.21            | 3049.27          | 15.25            | 22.34            | 6.10                 | 5356.00            | 6.46  | 36.85               | 0.25     | 14.9            | 4.3  | 6.654  | 0.033 | 49.8 | 6.48  | 0.08 |
| 3.6                                                                                                            | 15359.52                                             | 14.21            | 2362.64          | 14.56            | 25.92            | 6.17                 | 4942.23            | 6.85  | 27.81               | 0.23     | 11.6            | 3.3  | 7.927  | 0.048 | 50.9 | 6.48  | 0.08 |
| 4.0                                                                                                            | 7931.50                                              | 13.23            | 1289.55          | 16.42            | 33.46            | 6.45                 | 3850.05            | 6.31  | 14.49               | 0.18     | 6.3             | 1.8  | 11.317 | 0.139 | 52.7 | 6.35  | 0.12 |
| 5.0                                                                                                            | 22077.14                                             | 15.81            | 3342.33          | 14.50            | 31.18            | 5.91                 | 11942.34           | 9.76  | 43.98               | 0.25     | 16.4            | 4.7  | 13.547 | 0.058 | 48.5 | 6.29  | 0.08 |
| 6.0                                                                                                            | 27076.30                                             | 15.81            | 3750.92          | 15.35            | 56.37            | 6.24                 | 13246.17           | 10.37 | 57.01               | 0.33     | 18.4            | 5.3  | 13.392 | 0.054 | 44.5 | 6.30  | 0.08 |
| 7.0                                                                                                            | 24259.69                                             | 15.00            | 3369.67          | 15.29            | 65.60            | 6.31                 | 11752.32           | 9.70  | 50.20               | 0.32     | 16.5            | 4.7  | 13.230 | 0.059 | 45.5 | 6.43  | 0.09 |
| Age Plateau =6.88 ± 0.03 Ma (steps 0.9 - 2.1 watts, 100% <sup>39</sup> Ar released)                            |                                                      |                  |                  |                  |                  |                      |                    |       |                     |          |                 |      |        |       |      |       |      |
|                                                                                                                |                                                      |                  |                  |                  |                  |                      |                    |       |                     |          |                 |      |        |       |      |       |      |
|                                                                                                                |                                                      |                  |                  |                  |                  |                      |                    |       |                     |          |                 |      |        |       |      |       |      |
|                                                                                                                |                                                      |                  |                  |                  |                  |                      |                    |       |                     |          |                 |      |        |       |      |       |      |
| GUA 110-12, El Jute, whole rock, J ± 1σ = 1.1085 ± 0.001 (x10 <sup>-3</sup> ). Location: N 14.975 °, W 89.803° |                                                      |                  |                  |                  |                  |                      |                    |       |                     |          |                 |      |        |       |      |       |      |
| 0.9                                                                                                            | 10389.23                                             | 14.34            | 1931.37          | 15.14            | 12.64            | 5.76                 | 711.89             | 5.86  | 12.82               | 0.16     | 9.5             | 2.4  | 1.399  | 0.015 | 64.5 | 6.78  | 0.08 |
| 1.2                                                                                                            | 54869.72                                             | 19.33            | 13024.21         | 19.32            | 203.84           | 5.98                 | 5340.98            | 6.84  | 38.51               | 0.29     | 63.8            | 16.4 | 1.557  | 0.003 | 80.6 | 6.64  | 0.03 |
| 1.5                                                                                                            | 66997.67                                             | 22.01            | 16332.39         | 20.80            | 253.15           | 6.13                 | 4446.91            | 6.53  | 41.83               | 0.31     | 80.0            | 20.6 | 1.034  | 0.002 | 82.5 | 6.61  | 0.02 |
| 1.8                                                                                                            | 59050.30                                             | 22.01            | 14786.43         | 19.53            | 219.99           | 5.98                 | 6389.84            | 7.74  | 36.04               | 0.28     | 72.5            | 18.7 | 1.642  | 0.003 | 83.5 | 6.51  | 0.02 |
| 2.1                                                                                                            | 35840.46                                             | 16.75            | 9168.86          | 17.28            | 118.34           | 5.76                 | 8307.56            | 8.00  | 25.28               | 0.20     | 44.9            | 11.6 | 3.443  | 0.007 | 82.3 | 6.30  | 0.03 |
| 2.3                                                                                                            | 16460.64                                             | 14.34            | 4253.32          | 16.06            | 65.41            | 5.62                 | 6406.31            | 7.00  | 13.03               | 0.16     | 20.8            | 5.4  | 5.725  | 0.022 | 82.0 | 6.21  | 0.04 |
| 2.5                                                                                                            | 8472.75                                              | 13.22            | 2189.91          | 15.16            | 21.19            | 5.55                 | 4920.40            | 6.62  | 7.77                | 0.16     | 10.7            | 2.8  | 8.542  | 0.058 | 80.9 | 6.13  | 0.06 |
| 2.7                                                                                                            | 5293.31                                              | 13.37            | 1359.72          | 15.10            | 16.45            | 5.69                 | 4271.08            | 6.37  | 5.43                | 0.14     | 6.7             | 1.7  | 11.945 | 0.128 | 80.8 | 6.17  | 0.09 |
| 3.0                                                                                                            | 6828.58                                              | 13.59            | 1736.71          | 14.09            | 21.34            | 5.83                 | 6534.75            | 7.16  | 7.56                | 0.14     | 8.5             | 2.2  | 14.312 | 0.112 | 80.5 | 6.21  | 0.07 |
| 3.3                                                                                                            | 4461.97                                              | 12.32            | 1109.13          | 15.08            | 19.06            | 5.76                 | 4488.93            | 6.34  | 4.87                | 0.14     | 5.4             | 1.4  | 15.398 | 0.201 | 81.6 | 6.45  | 0.12 |
| 3.6                                                                                                            | 2763.87                                              | 13.01            | 685.88           | 14.45            | 0.00             | 5.69                 | 2570.97            | 5.99  | 3.19                | 0.11     | 3.4             | 0.9  | 14.265 | 0.288 | 78.6 | 6.22  | 0.16 |
| 4.0                                                                                                            | 2597.88                                              | 12.59            | 617.35           | 15.72            | 11.03            | 5.83                 | 2304.89            | 5.90  | 2.64                | 0.10     | 3.0             | 0.8  | 14.212 | 0.346 | 82.2 | 6.79  | 0.20 |
| 5.0                                                                                                            | 3652.92                                              | 13.22            | 896.48           | 15.08            | 0.00             | 5.83                 | 3655.89            | 6.41  | 4.27                | 0.12     | 4.4             | 1.1  | 15.528 | 0.250 | 79.2 | 6.34  | 0.14 |
| 6.0                                                                                                            | 6181.84                                              | 13.59            | 1484.47          | 14.30            | 13.35            | 5.34                 | 6221.75            | 7.16  | 8.07                | 0.15     | 7.3             | 1.9  | 15.963 | 0.148 | 75.3 | 6.16  | 0.09 |
| 7.0                                                                                                            | 8639.62                                              | 13.37            | 1745.69          | 14.03            | 0.00             | 5.98                 | 8344.11            | 8.34  | 14.04               | 0.17     | 8.6             | 2.2  | 18.209 | 0.141 | 65.3 | 6.35  | 0.09 |
| 8.0                                                                                                            | 19248.87                                             | 13.90            | 2623.87          | 14.49            | 32.40            | 5.83                 | 8739.79            | 8.24  | 40.29               | 0.25     | 12.9            | 3.3  | 12.782 | 0.069 | 44.5 | 6.40  | 0.09 |
| 9.0                                                                                                            | 18078.51                                             | 12.97            | 2527.48          | 14.48            | 25.23            | 6.17                 | 8201.38            | 7.90  | 36.68               | 0.28     | 12.4            | 3.2  | 12.455 | 0.070 | 46.3 | 6.50  | 0.10 |
| 8.0                                                                                                            | 5892.63                                              | 11.81            | 1347.63          | 15.10            | 19.21            | 6.18                 | 6417.48            | 6.51  | 8.27                | 0.14     | 6.6             | 1.7  | 18.287 | 0.196 | 73.7 | 6.33  | 0.10 |
| 9.0                                                                                                            | 12855.89                                             | 13.90            | 1383.36          | 15.10            | 18.35            | 5.98                 | 6506.37            | 7.19  | 30.89               | 0.26     | 6.8             | 1.7  | 18.066 | 0.189 | 36.0 | 6.58  | 0.16 |

**Table S1-2.** Heating step releases and statistics for the calculation of whole rock basalt <sup>40</sup>Ar/<sup>39</sup>Ar ages.

## Supplement 2. Terrestrial $^{10}\text{Be}$ measurements and conversion to erosion rates

Sediment grain sizes were separated using a phi-scale sieve set. Fractions coarser than 2 mm were crushed and sieved to obtain a 0.25-0.5 mm powder. Quartz isolation, purification and dissolution, ion exchange extraction and precipitation of beryllium were performed following an adaptation of the technique of (Kohl and Nishiizumi 1992). A  $^9\text{Be}$  carrier (Scharlau BE03450100 carrier batch 2Q2P – 14/10/10) with a measured  $^{10}\text{Be}/^9\text{Be}$  ratio of  $1.5 \times 10^{-15}$  was added to each sample. Beryllium hydroxide was precipitated at pH 8-9, oxidized to  $\text{BeO}$  over an open butane-propane flame and mixed with Nb powder. The  $^{10}\text{Be}/^9\text{Be}$  ratio was measured by accelerator mass spectrometry (AMS) at PRIME lab, Purdue University. Results were normalized to the 07KNSTD standard (Nishiizumi, Imamura et al. 2007) with an assumed  $^{10}\text{Be}/^9\text{Be}$  ratio of  $2.79 \times 10^{-11}$  (Balco 2009). The  $^{10}\text{Be}/^9\text{Be}$  ratios of the procedural blanks ranged from  $1.6 \pm 0.4 \times 10^{-15}$  to  $7.1 \pm 1.5 \times 10^{-15}$  (mean  $2.0 \pm 0.5 \times 10^{-15}$ ,  $n=4$ ). Reported one-sigma uncertainties (Table B1) encompass uncertainties on Purdue AMS measurement, uncertainty on the primary standard, and uncertainties on blank corrections.

| Soil/rock<br>Sample <sup>(1)</sup> | Easting | Northing | Elevation | Quartz<br>used | $[^{10}\text{Be}]$           | Shielding<br>factor <sup>(2)</sup> | $P_{\mu}$ <sup>(3)</sup>               | $P_{\text{spal}}$ <sup>(3)</sup>       | Integrated<br>wet bulk<br>density <sup>(4)</sup> | Erosion<br>Rate <sup>(5)</sup> | Quartz<br>enrichment<br>factor <sup>(4)</sup> | Erosion<br>Rate <sup>(5)</sup> | Erosion<br>Rate Below<br>Upland surface |
|------------------------------------|---------|----------|-----------|----------------|------------------------------|------------------------------------|----------------------------------------|----------------------------------------|--------------------------------------------------|--------------------------------|-----------------------------------------------|--------------------------------|-----------------------------------------|
|                                    | (°)     | (°)      | (m)       | (g)            | ( $10^4 \text{ at g}^{-1}$ ) |                                    | ( $\text{at g}^{-1} \text{ yr}^{-1}$ ) | ( $\text{at g}^{-1} \text{ yr}^{-1}$ ) | ( $\text{g cm}^{-3}$ )                           | m/My                           |                                               | m/My                           | m/My                                    |
| CLP1 (47-61)r*                     | -89.621 | 15.149   | 2,610     | ?              | $41.2 \pm 1.2$               | 0.97                               | 0.41                                   | 16.6                                   | $2.6 \pm 0.1$                                    | $27.6 \pm 2.6$                 | $1.0 \pm 0.0$                                 | $27.6 \pm 2.6$                 | $0 \pm 4$                               |
| CLP2 (47-62)r*                     | -89.621 | 15.149   | 2,610     | ?              | $34.2 \pm 1.1$               | 0.97                               | 0.41                                   | 16.6                                   | $2.6 \pm 0.1$                                    | $32.9 \pm 3.1$                 | $1.0 \pm 0.0$                                 | $32.9 \pm 3.1$                 | $0 \pm 4$                               |
| SM1 (10-53)s°                      | -89.687 | 15.132   | 2,275     | 10.60          | $146.3 \pm 13.5$             | 0.92                               | 0.37                                   | 13.0                                   | $1.6 \pm 0.2$                                    | $11.2 \pm 2.1$                 | $1.0 \pm 0.0$                                 | $11.2 \pm 2.1$                 | $12 \pm 4$                              |
| SM2 (10-52)s°                      | -89.687 | 15.132   | 2,275     | 29.38          | $20.1 \pm 4.2$               | 0.92                               | 0.37                                   | 13.0                                   | $1.6 \pm 0.2$                                    | $78.5 \pm 20.9$                | $1.4 \pm 0.3$                                 | $110 \pm 38$                   | $12 \pm 4$                              |
| SM3 (47-101)s*                     | -89.645 | 15.124   | 1,875     | ?              | $13.4 \pm 0.6$               | 0.92                               | 0.33                                   | 10.1                                   | $1.6 \pm 0.2$                                    | $84.1 \pm 13.2$                | $1.4 \pm 0.3$                                 | $118 \pm 31$                   | $41 \pm 4$                              |

**Table S2-1.** Soil  $^{10}\text{Be}$  samples locations, concentrations and environmental parameters. [1] Sample type: s: soil, r: rock. Standard used: \*: 07KNSTD, °: KNSTD [2]: combination of topographic obstruction and vegetation shielding. [3] Production rates for neutrons ( $P_{\text{spal}}$ ) and muons ( $P_{\mu}$ ), calculated using the CRONUS calculator for a polar sea-level  $^{10}\text{Be}$  production rate of  $5.1 \text{ at g}^{-1} \text{ yr}^{-1}$  (Balco, Stone et al. 2008), for indicated shielding factor. [4] Quartz enrichment and soil density from published measurements in similarly eroding tropical soils and saprolite (White, Blum et al. 1998, Ferrier, Kirchner et al. 2010, Brocard, Willenbring et al. 2015). [5] CRONUS-calculated using time-dependent  $^{10}\text{Be}$  production rate (version 2.3, constants version 2.3, muons version 1.1).

| Stream <sup>(1)</sup> | Easting | Northing | Quartz used | [ <sup>10</sup> Be]                   | Quartz-bearing <sup>(2)</sup> lithologies | A <sub>Qz</sub> Average Elevation <sup>(3)</sup> | Denudation Rate Unweighted <sup>(3,5)</sup> | Denudation Rate weighted <sup>(5, 6)</sup> | Denudation Rate Qz enrichment | Erosion Below Upland surface |
|-----------------------|---------|----------|-------------|---------------------------------------|-------------------------------------------|--------------------------------------------------|---------------------------------------------|--------------------------------------------|-------------------------------|------------------------------|
|                       | (°)     | (°)      | (g)         | (10 <sup>4</sup> at g <sup>-1</sup> ) | (% total catchment)                       | (m)                                              | (m/Myr)                                     | (m/Myr)                                    | (m/Myr)                       | (m/Myr)                      |
| COL (SM)*             | -89.644 | 15.124   | 32.41       | 126.84 ± 2.09                         | CU(100)                                   | 2,122                                            | 11.0 ± 1.7                                  | 11.0 ± 1.7                                 | 15 ± 4                        | 24 ± 4                       |
| FRI (SM)*             | -89.650 | 15.109   | 27.23       | 24.37 ± 0.66                          | CU(100)                                   | 2,050                                            | 54.3 ± 8.4                                  | 54.3 ± 8.4                                 | 76 ± 20                       | 28 ± 4                       |
| SLO (SM)*             | -90.183 | 14.957   | 16.85       | 6.90 ± 0.34                           | CU(100)                                   | 1,892                                            | 163 ± 26                                    | 163 ± 26                                   | 228 ± 61                      | 35 ± 4                       |
| RAN (SM)*             | -89.655 | 15.030   | 32.56       | 5.94 ± 0.31                           | CU(70)                                    | 915                                              | 108 ± 10                                    | 101 ± 11                                   | 142 ± 34                      | 60 ± 4                       |
| SCO (SM)*             | -90.101 | 15.104   | 28.31       | 25.84 ± 0.51                          | CU(81)                                    | 2,014                                            | 67.9 ± 6.7                                  | 63.9 ± 6.7                                 | 90 ± 21                       | 38 ± 4                       |
| SIM (SM)*             | -90.169 | 15.112   | 45.18       | 21.46 ± 0.90                          | CU(95)                                    | 1,856                                            | 54.4 ± 5.8                                  | 51.2 ± 5.7                                 | 72 ± 17                       | 26 ± 4                       |
| SBM (SM)*             | -90.182 | 15.079   | 42.55       | 27.56 ± 1.12                          | CU(100)                                   | 1,695                                            | 38.0 ± 6.0                                  | 38.4 ± 6.0                                 | 54 ± 14                       | 45 ± 4                       |
| MOR (SC)*             | -90.183 | 14.957   | 17.97       | 9.82 ± 0.37                           | CU(81)SR(2)                               | 1,122 (1,213)                                    | 77.7 ± 11.4                                 | 73.8 ± 11.3                                | 103 ± 27                      | 61 ± 4                       |
| SALS (SC)*            | -90.282 | 15.061   | 33.66       | 21.14 ± 0.48                          | CU(92)QP(8)                               | 1,330 (1,304)                                    | 39.9 ± 6.2                                  | 40.5 ± 6.2                                 | 57 ± 15                       | 73 ± 4                       |
| SALI (SC)*            | -90.304 | 15.095   | 33.05       | 15.36 ± 0.34                          | CU(63)QP(25)SR(12)                        | 1,326 (1,243)                                    | 52.7 ± 8.3                                  | 55.4 ± 8.4                                 | 73 ± 17                       | 71 ± 4                       |
| SMS (SC)°             | -90.382 | 15.025   | 26.15       | 19.50 ± 0.38                          | CU(100)                                   | 1,707                                            | 50.2 ± 7.6                                  | 50.2 ± 7.6                                 | 70 ± 19                       | 50 ± 4                       |
| SMM (SC)*             | -90.388 | 15.062   | 51.13       | 21.00 ± 0.32                          | CU(100)                                   | 1,611                                            | 48.7 ± 7.4                                  | 48.7 ± 7.4                                 | 68 ± 18                       | 58 ± 4                       |
| SMI (SC)°             | -90.382 | 15.148   | 30.62       | 20.63 ± 0.11                          | CU(69)QP(22)SR(9)                         | 1,391 (1,292)                                    | 44.6 ± 7.0                                  | 47.3 ± 7.1                                 | 69 ± 17                       | 66 ± 4                       |
| SGA (SC)*             | -90.406 | 15.148   | 43.49       | 24.67 ± 0.41                          | CU(43)QP(18)SR(69)                        | 1,172 (1,127)                                    | 30.6 ± 4.8                                  | 31.5 ± 4.8                                 | 44 ± 12                       | 77 ± 4                       |
| PAT (SC)°             | -90.557 | 15.145   | 30.09       | 14.65 ± 0.43                          | CU(55)SR(45)                              | 1,224 (1,330)                                    | 63.5 ± 9.2                                  | 59.7 ± 9.1                                 | 84 ± 22                       | 76 ± 4                       |
| ECS (SC)°             | -90.559 | 14.992   | 15.01       | 20.84 ± 5.20                          | CU(91)                                    | 1,974                                            | 64.6 ± 20.0                                 | 64.6 ± 20.0                                | 90 ± 34                       | 38 ± 4                       |
| COT (SC)°             | -90.616 | 14.905   | 20.29       | 17.89 ± 0.61                          | CU(100)                                   | 1,637                                            | 61.9 ± 9.6                                  | 61.9 ± 9.6                                 | 87 ± 23                       | 71 ± 4                       |
| XEU (SC)°             | -90.603 | 15.058   | 50.22       | 7.08 ± 0.28                           | CU(100)                                   | 1,746                                            | 162 ± 25                                    | 162 ± 25                                   | 227 ± 60                      | 55 ± 4                       |
| CUB (SC)*             | -90.592 | 15.123   | 35.64       | 8.24 ± 0.27                           | CU(88)QP(11)                              | 1,432 (1,389)                                    | 103 ± 15                                    | 106 ± 16                                   | 148 ± 39                      | 73 ± 4                       |
| PAC (SC)°             | -90.646 | 15.155   | 33.28       | 10.77 ± 0.28                          | CU(98)SR(2)                               | 1,211 (1,213)                                    | 80.2 ± 12.1                                 | 80.2 ± 12.1                                | 112 ± 29                      | 67 ± 4                       |
| PAS (SC)*             | -90.681 | 15.090   | 32.13       | 10.27 ± 0.25                          | CU(100)                                   | 1,947                                            | 112 ± 17                                    | 112 ± 17                                   | 157 ± 41                      | 38 ± 4                       |
| PAE (SC)*             | -90.707 | 15.125   | 26.01       | 7.31 ± 0.26                           | CU(100)                                   | 1,779                                            | 146 ± 22                                    | 146 ± 22                                   | 204 ± 54                      | 50 ± 4                       |
| CHI (SC)*             | -90.761 | 15.158   | 15.12       | 28.90 ± 0.75                          | CU(100)                                   | 1,838                                            | 40.0 ± 6.2                                  | 40.0 ± 6.2                                 | 56 ± 14                       | 40 ± 4                       |
| SAC (SC)*             | -90.911 | 15.153   | 12.04       | 17.76 ± 0.54                          | CU(100)                                   | 1,865                                            | 65.8 ± 10.1                                 | 65.8 ± 10.1                                | 92 ± 24                       | 47 ± 4                       |
| XOL (SC)*             | -91.002 | 15.144   | 20.95       | 13.80 ± 0.62                          | CU(97)QP(3)                               | 1,889 (1,890)                                    | 84.2 ± 13.3                                 | 85.4 ± 13.4                                | 113 ± 28                      | 40 ± 4                       |
| ACA (SC)°             | -90.914 | 15.206   | 20.09       | 12.88 ± 0.38                          | CU(83)QP(17)                              | 1,635 (1,570)                                    | 81.5 ± 8.5                                  | 84.6 ± 12.9                                | 118 ± 31                      | 54 ± 4                       |
| CATA (CH)*            | -91.130 | 15.495   | 55.62       | 26.56 ± 1.07                          | SR(18)TS(22)QP(7)                         | 1,944 (1,880)                                    | 44.1 ± 7.1                                  | 45.7 ± 7.2                                 | 64 ± 17                       | 98 ± 4                       |
| CHEL (CH)*            | -91.129 | 15.504   | 50.65       | 13.49 ± 0.48                          | SR(25)TS(20)QP(3)                         | 2,102 (2,027)                                    | 88.6 ± 9.5                                  | 92.2 ± 14.3                                | 129 ± 34                      | 95 ± 4                       |
| SUM (CH)*             | -91.129 | 15.495   | 35.37       | 3.68 ± 0.17                           | SR(73)TS(14)                              | 1,885 (1,820)                                    | 284 ± 32                                    | 294 ± 46                                   | 412 ± 109                     | 90 ± 4                       |
| IXT (CH)*             | -91.089 | 15.621   | 44.45       | 2.99 ± 0.13                           | SR(93)TS(6)                               | 1,602 (1,720)                                    | 333 ± 34                                    | 310 ± 48                                   | 434 ± 115                     | 116 ± 4                      |
| XAC (CH)*             | -91.087 | 15.619   | 15.38       | 4.04 ± 0.35                           | SR(50)TS(16)QP(2)                         | 2,041 (1,923)                                    | 258 ± 32                                    | 274 ± 47                                   | 384 ± 105                     | 96 ± 4                       |

**Table S2-2. <sup>10</sup>Be concentrations and environmental parameters used for the calculation of catchment-wide erosion rates**

[1] Sample location: SM: Sierra de las Minas, SC: Sierra de Chuacús, CH: Cuchumatanes Highs. Standard used: \*: 07KNSTD, °: KNSTD. [2] Weighting of lithologies in subsequent calculations as follows, normalized to Chuacús (CH): SR: Santa Rosa Fm. (0.4), QP: Quaternary pumice (0.1), Todos Santos Fm. (0.6). [3] Values after applying the quartz-content weighting. [4] Production rates for neutrons (P<sub>spal</sub>) and muons (P<sub>μ</sub>), calculated using the CRONUS calculator for a polar sea-level <sup>10</sup>Be production rate of



5.1  $\text{at g}^{-1} \text{y}^{-1}$  (Balco, Stone et al. 2008), for the indicated topographic shielding and vegetation shielding of 7%. [5] Calculated using ground densities and quartz enrichment factor as for soils in Table SI-21, using the CHRONUS time-depend production rate scheme [6] No weighting according to quartz content for quartz-bearing lithologies.

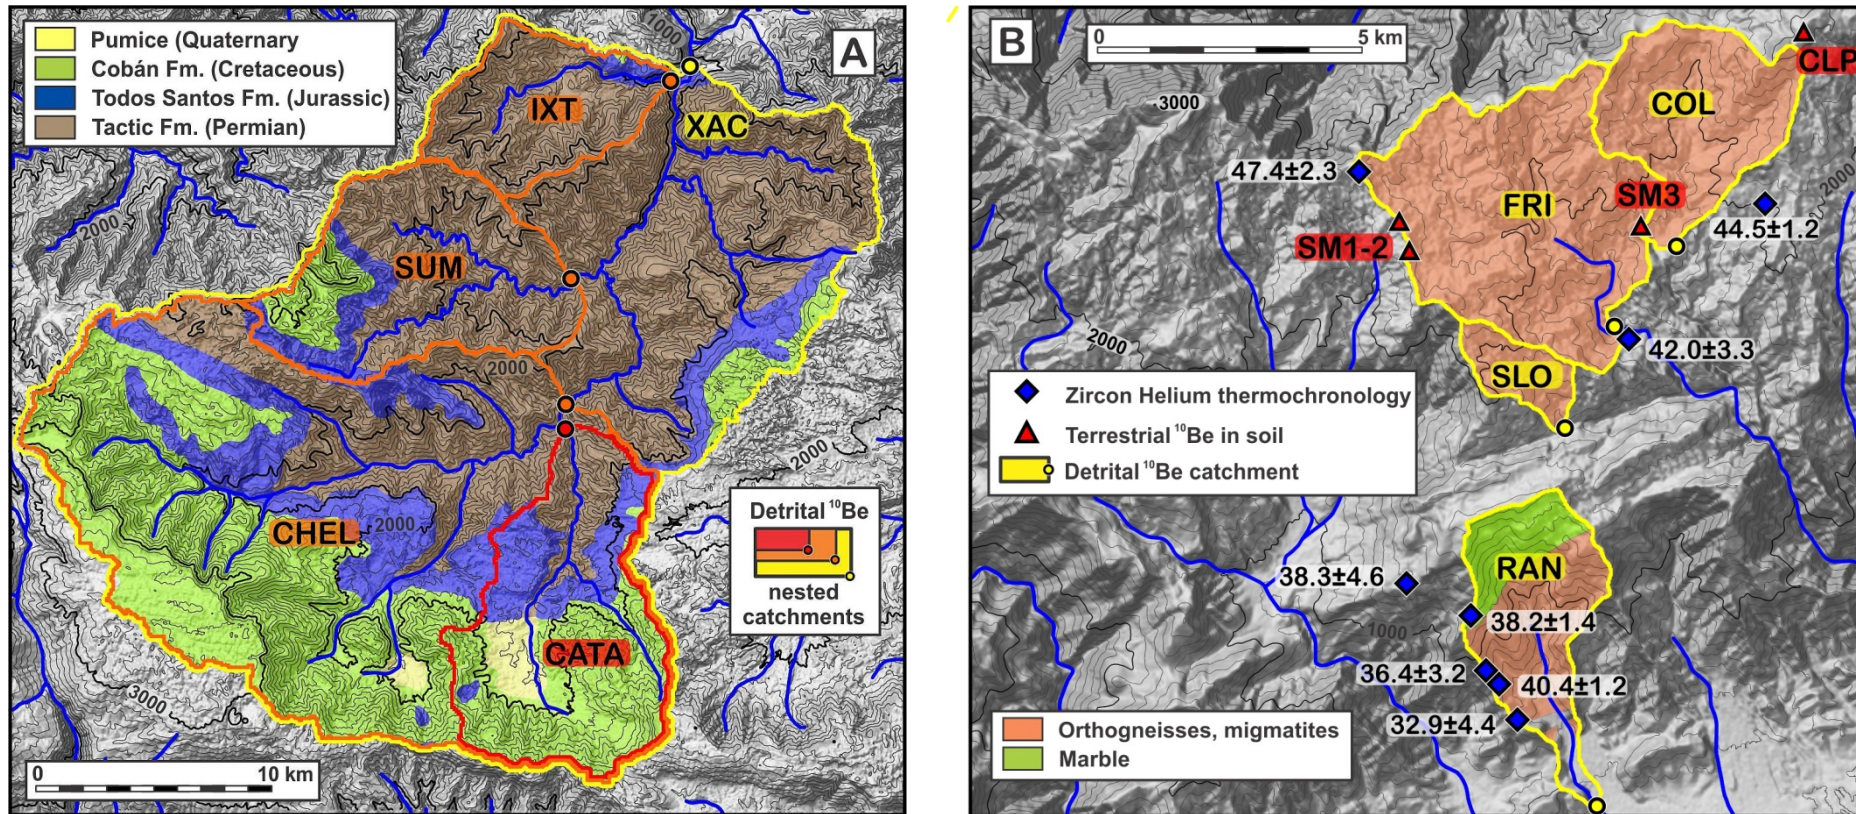

**Figure S2-3.** Detrital  $^{10}\text{Be}$  catchments lithology. (a): Altos de Cuchumatanes (CATA: Catarata, CHEL: Chel, IXT: Ixtahuacan, SUM: Sumalá, XACB: Xacbal), (b): Sierra de las Minas (COL: Colorado, FRI: Frío, RAN: Quebrada Ranchitos/In situ, CLP: Cerro las Palomas, SM: Sierra de las Minas). Zircon data from (Simon-Labric, Brocard et al. 2013)



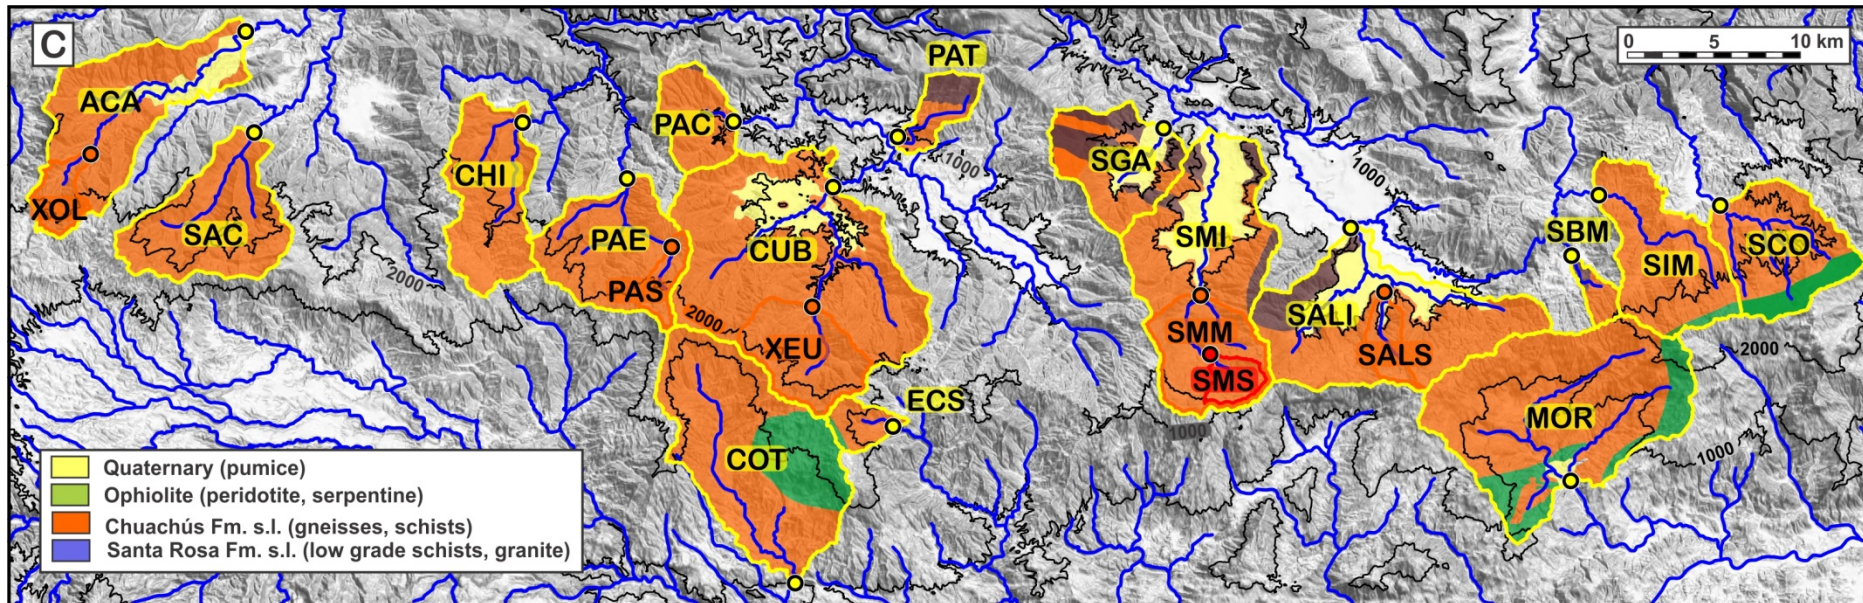

(c): Sierra de Chuacús (ACA: Agua Caliente, CHI: COT: Cotón, CUB: Cubulco, ECS: El Chol Superior, MOR: Morazán, PAC: Pacani, PAE: Paguozá East, PAS: Paguozá South, PAT: Patixla, SAC: Sacaj, SALI: Salamá Inferior, SALS: Salamá Superior, SBM: Santa Barbara Modern, SCO: Chilasco, SGA: San Gabriel, SIM: San Isidro Modern, SMI: San Miguel Inferior, SMM: San Miguel Medio, SMS: San Miguel Superior, XEU: Xeúl, XOL: Xoljá).

## References

- Balco, G. (2009). "<sup>26</sup>Al-<sup>10</sup>Be exposure age/erosion rate calculators: update from v. 2.1 to v. 2.2." [CRONUS Online Calculator](http://hess.ess.washington.edu), <http://hess.ess.washington.edu>.
- Balco, G., et al. (2008). "A complete and easily accessible means of calculating surface exposure ages or erosion rates from (<sup>10</sup>)Be and (<sup>26</sup>)Al measurements." *Quaternary Geochronology* **3**(3): 174-195.
- Brocard, G. Y., et al. (2015). "Effects of a tectonically-triggered wave of incision on riverine exports and soil mineralogy in the Luquillo Mountains of Puerto Rico." *Applied Geochemistry* **63**: 586-598.
- Ferrier, K. L., et al. (2010). "Mineral-specific chemical weathering rates over millennial timescales: Measurements at Rio Icacos, Puerto Rico." *Chemical Geology* **277**(1-2): 101-114.
- Kohl, C. P. and K. Nishiizumi (1992). "CHEMICAL ISOLATION OF QUARTZ FOR MEASUREMENT OF INSITU-PRODUCED COSMOGENIC NUCLIDES." *Geochimica et Cosmochimica Acta* **56**(9): 3583-3587.
- Nishiizumi, K., et al. (2007). "Absolute calibration of <sup>10</sup>Be AMS standards." *Nuclear Instruments and Methods in Physics Research Section B: Beam Interactions with Materials and Atoms* **258**(2): 403-413.
- Simon-Labric, T., et al. (2013). "Preservation of contrasting geothermal gradients across the Caribbean-North America plate boundary (Motagua Fault, Guatemala)." *Tectonics*: n/a-n/a.
- White, A. F., et al. (1998). "Chemical weathering in a tropical watershed, Luquillo Mountains, Puerto Rico: I. Long-term versus short-term weathering fluxes." *Geochimica et Cosmochimica Acta* **62**(2): 209-226.

### Supplement 3. Stream segmentation using LSDTopoTools

We analyzed longitudinal channel profiles using the statistical approach of (Mudd, Attal et al. 2014) implemented using LSDTopoTools, which identifies locations where either erodibility or erosion rates are most likely to change. The software recursively tests possible various combinations of contiguous segments along the selected rivers (Table S3-1), allowing identification of most likely m/n ratio of each river, the statistically most likely number of linearized segments, and their extent (Fig. S3-2). The statistical analysis is performed over after 300 iterations of the segment finding algorithm, and for m/n ratio varying at 0.25 intervals over a range from 0.1 to 0.9. The averaged m/n ratio of the investigated subset of rivers is  $0.48 \pm 0.11$ .

| Rivers              | Best estimate m/n ratio | STD AICc value | Rivers            | Best estimate m/n ratio | STD AICc value |
|---------------------|-------------------------|----------------|-------------------|-------------------------|----------------|
| Blanco              | 0.525                   | 130.522        | Las Canoas        | 0.550                   | 31.3209        |
| Cacuj               | 0.525                   | 209.432        | Pagueza           | 0.500                   | 28.1190        |
| Chibalam-Yerbabuena | 0.675                   | 177.548        | Quillila-Carchela | 0.675                   | 85.8668        |
| ChitapolC           | 0.625                   | 262.905        | Rabinal           | 0.450                   | 90.7101        |
| ChitapolE           | 0.500                   | 62.5817        | Sacaj             | 0.450                   | 112.203        |
| Chixoy              | 0.375                   | 152.800        | Salama            | 0.600                   | 6.53611        |
| Cucul               | 0.500                   | 65.7579        | San Miguel        | 0.475                   | 160.916        |
| Ekca-Xecam-Chilil   | 0.350                   | 158.868        | Sicache           | 0.300                   | 412.876        |
| El Molino           | 0.350                   | 303.865        | Xeul              | 0.550                   | 56.9638        |
| Las Barras          | 0.325                   | 4.66082        |                   |                         |                |

**Table S3-1.** Results from statistical method based on the corrected Akaike Information Criterion (AICc) presenting the best estimate m/n ratio for selected rivers in the region. The statistical analysis is running for the main stem and standard deviation of the AICc values are measured after 300 iterations of the segment finding algorithm (Mudd, Attal et al. 2014).

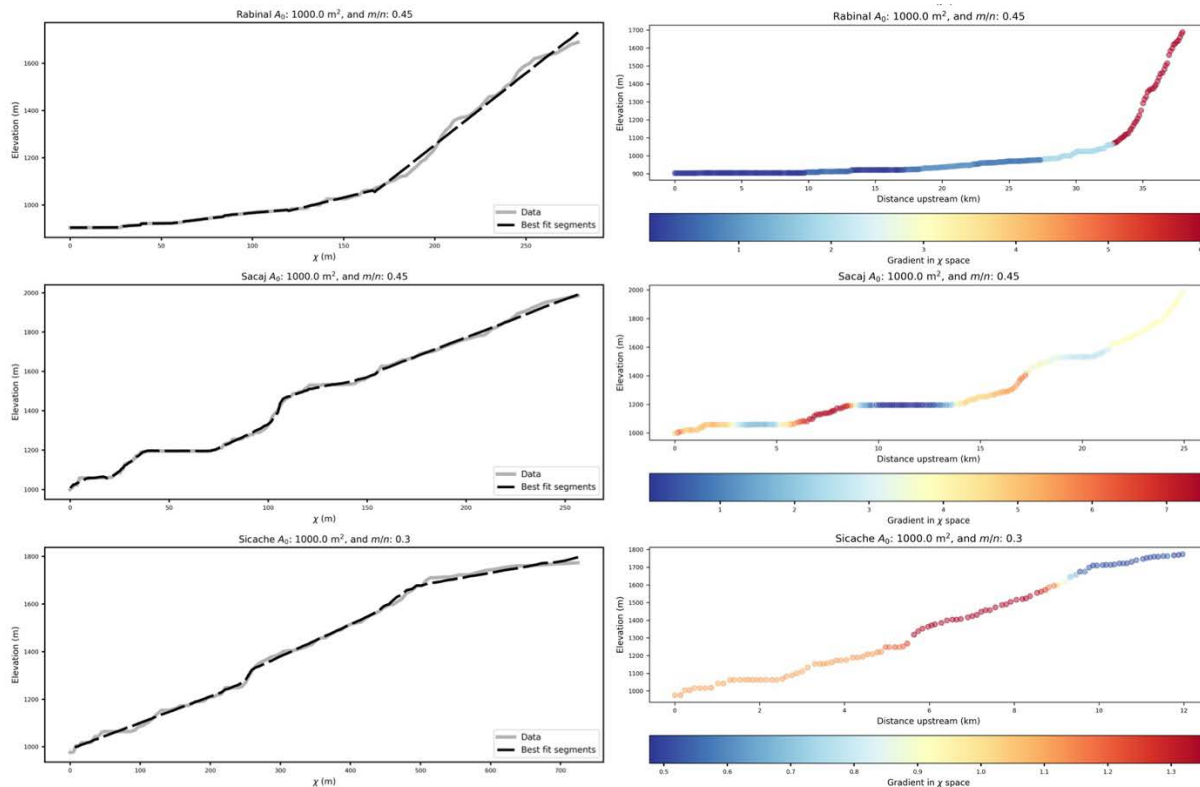

**Figure S3-2.** Left: segment fitting for three examples of river profiles using the best estimate m/n ratio from the statistical analysis presented in Table SI-31. Right: channel profiles colored by the best fit slope in  $\chi$ -elevation space.

Mudd, S. M., et al. (2014). "A statistical framework to quantify spatial variation in channel gradients using the integral method of channel profile analysis." *Journal of Geophysical Research: Earth Surface* **119**(2): 138-152.



## Supplement 4. Knickpoints and segments classification

**Table S4-1. River segments and knickpoints (excel file).**

| <u>Knickpoints</u>                                   |                                             |                                   |
|------------------------------------------------------|---------------------------------------------|-----------------------------------|
| <b>headward migrating</b>                            | <b>alluvial reaches</b>                     | <b>other</b>                      |
| ▶ in hard substrate                                  | ● convex up: fine to coarse-grained         | ◆ landslide                       |
| ▶ in soft substrate                                  | ▲ concave up: bouldery fan apex             | ◆ epigeny                         |
| ▶ semi-autogenic                                     | ▲ concave up: gravelly fan apex             | ○ undetermined                    |
|                                                      | ▲ concave up: pediment apex                 | ▼ sinkhole                        |
| <b>bedrock erodibility</b>                           | <b>bedrock structural grain orientation</b> | <b>Rock uplift</b>                |
| ● high to low erodibility                            | ● parallel to perpendicular                 | ▲ convex up: downstream increase  |
| ● low to high erodibility                            | ● perpendicular to parallel                 | ▼ concave up: downstream decrease |
| <b><u>Stream segment gradient controlled by:</u></b> |                                             |                                   |
| — bedrock                                            | — gravel                                    | — boulder, mixed boulder-gravel   |
| — mixed bedrock-gravel                               | — colluvium                                 | — boulder and bedrock             |
|                                                      |                                             | — undetermined                    |

**Legend of figures S4-2 to S4-6.**

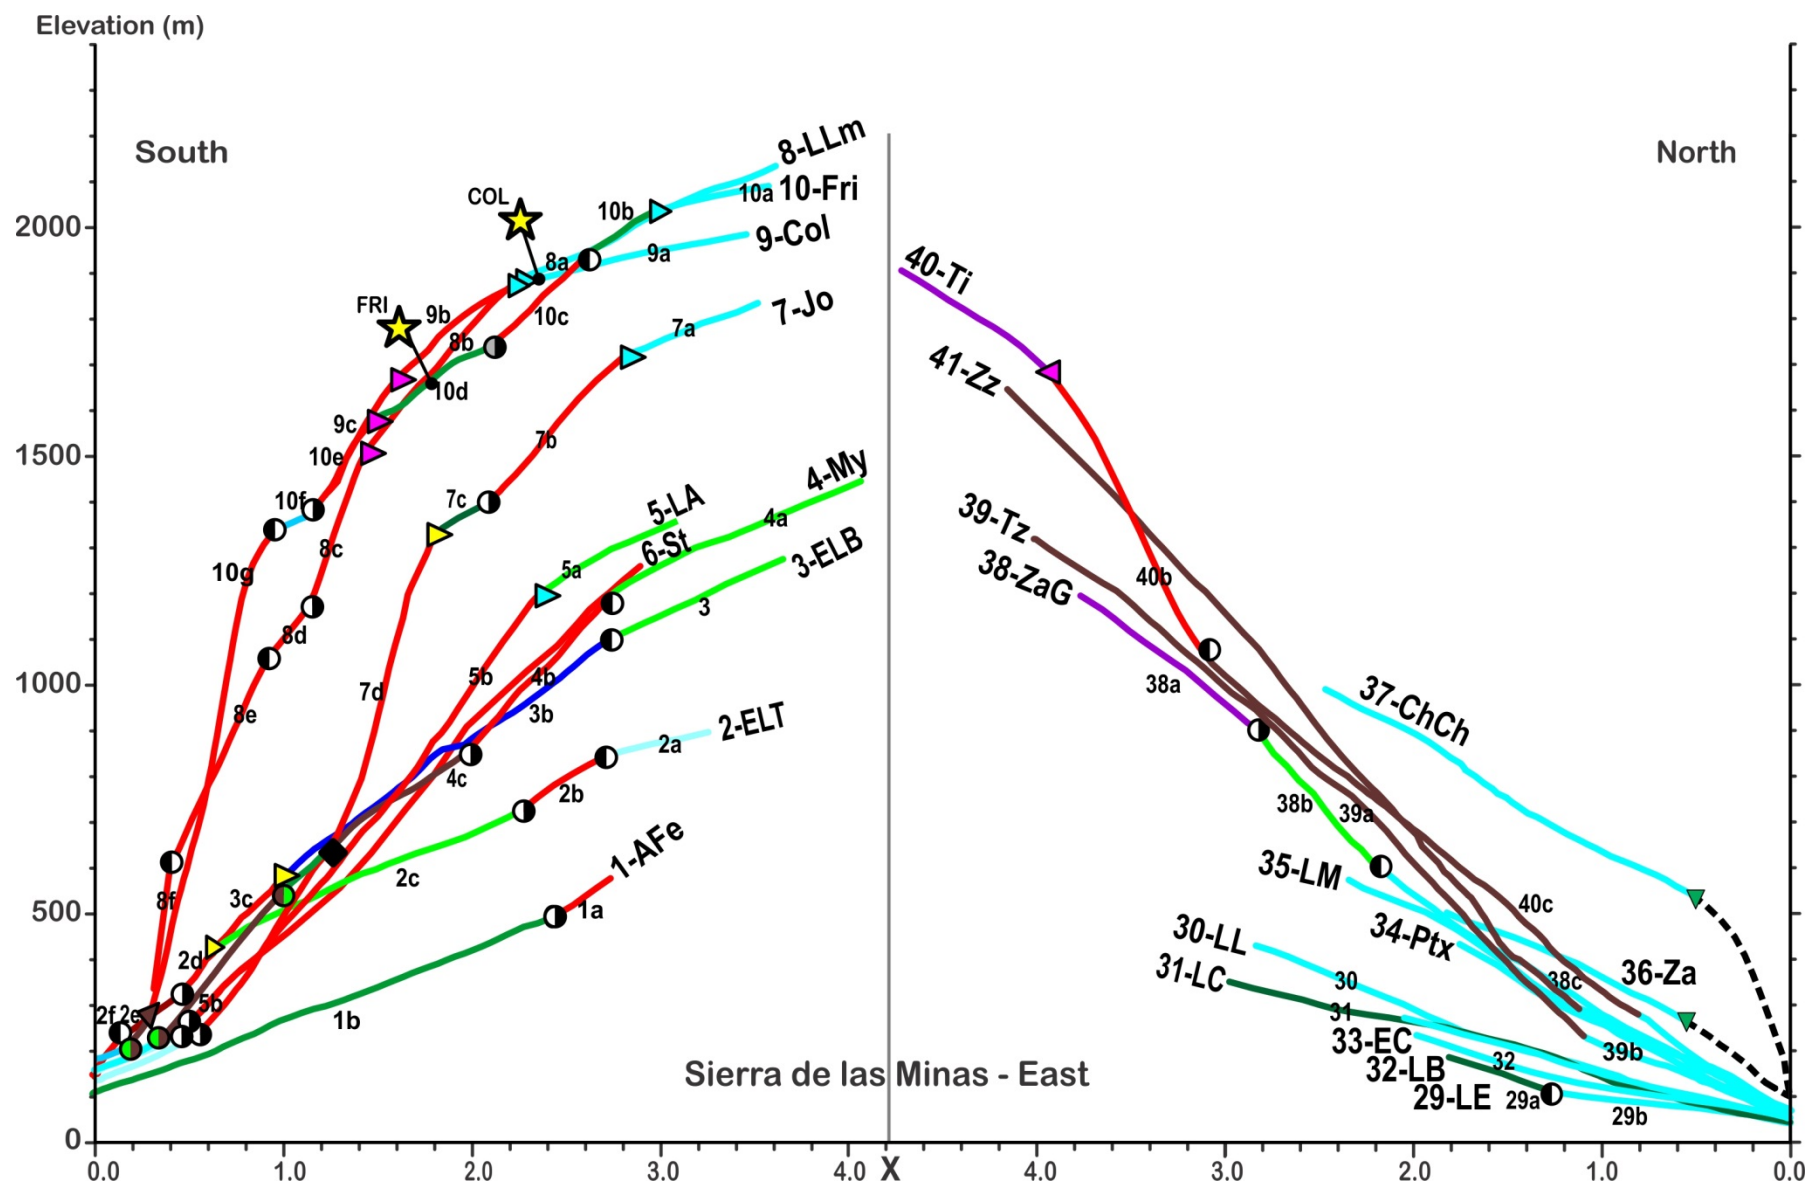

**Figure S4-2. X-plots of streams draining the eastern Sierra de las Minas.**

Stream names: Southern flank: 1-AFe: Agua Fría east; 2-ELT: El Lobo-Tinto; 3-ELB: El Lobo-Blanco; 4-My: Mayuelas, 5-LA: Los Achiotes, 6-St: Santiago, 7-Jo: Jones, 8-LLm: La Lima, 9-Col: Colorado, 10-Fri: Agua Fría. Northern flank: 29-LE: Los Espinos, 30-LL: Los Limones, 31-LC: Las Cañas, 32-LB: Las Balandras, 33-EC: El Chapín, 34-Ptx: Pataxte, 35-LM: Las Minas, 36-Za: Zarquito, 37-ChCh: river on carbonates ending in sinkhole, 38-ZaG: Zarco Grande, 39-Tz: Tze, 40-Ti: Tinajas, 41-Zz: Zarzaparillas. Yellow stars: sampling sites for detrital  $^{10}\text{Be}$  erosion rate measurements.

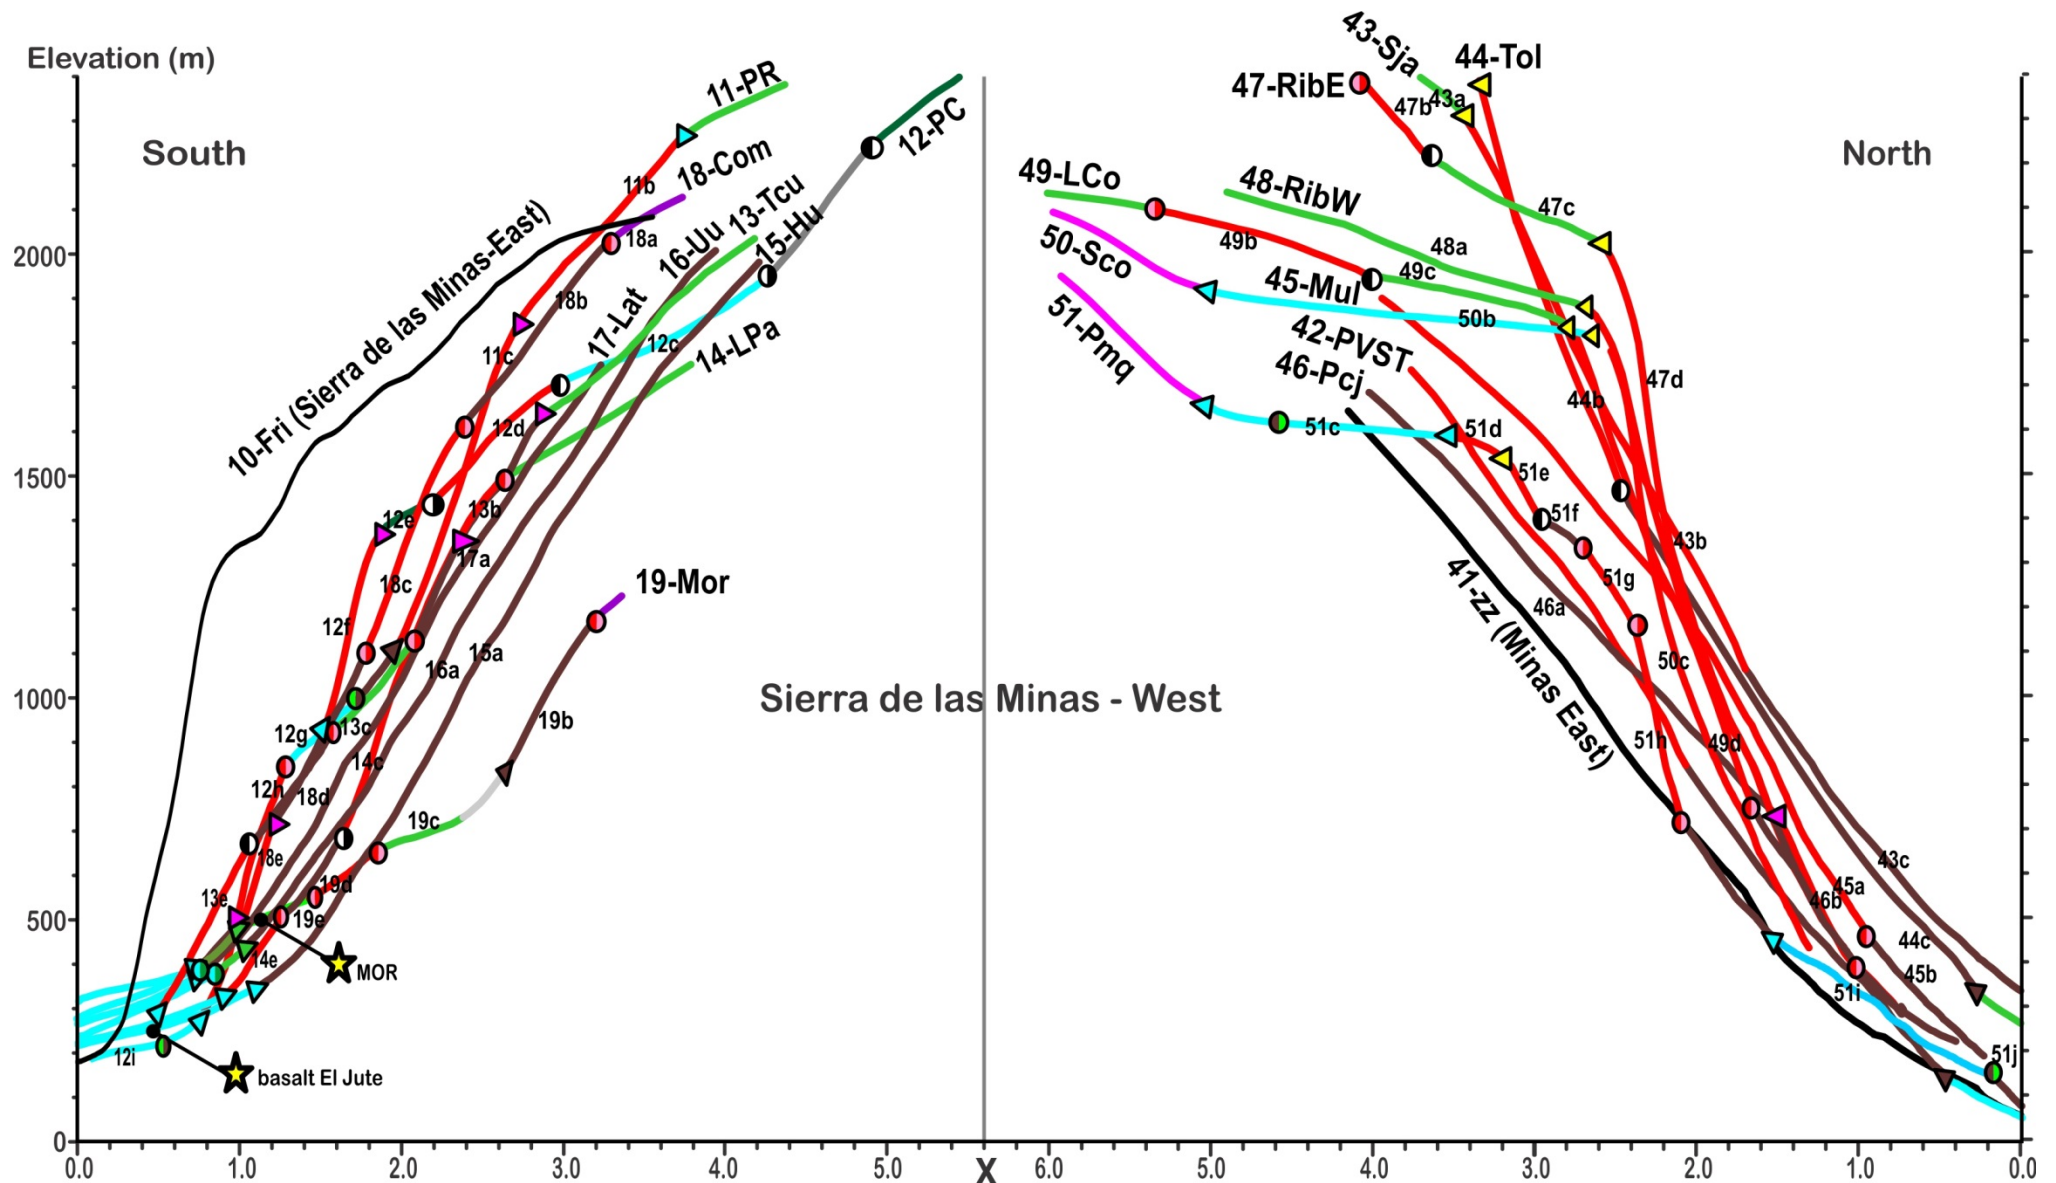

**Figure S4-3.  $\chi$ - plot of streams draining the western part of the Sierra de las Minas.**

Stream names : Southern flank: 11-PR: Pasabien Repollal, 12-PC: Pasabien-Chorro, 13-Tcu: Teculután, 14-LPa: La Palmilla, 15-Hu: Huijo, 16-Uu: Uyus, 17-Lat: Lato, 18-Com: Comaja, 19-Mor: Morazán. Northern flank: 41-Zz: Zarzaparilla, 42-PVST: Pueblo Viejo-Santo Toribio, 43-Sja: Samilija, 44-Tol: Toila, 45-Mul, Mululjá, 46-Pcj: Pancajoc, 47-RibE: Ribaco east, 48-RibW: Ribaco west, 49-LCo: La Concepción, 50-Sco: Chilasco, 51-Pmq: Panimaquito. Yellow stars: sampling sites for detrital  $^{10}\text{Be}$  erosion rate measurements.

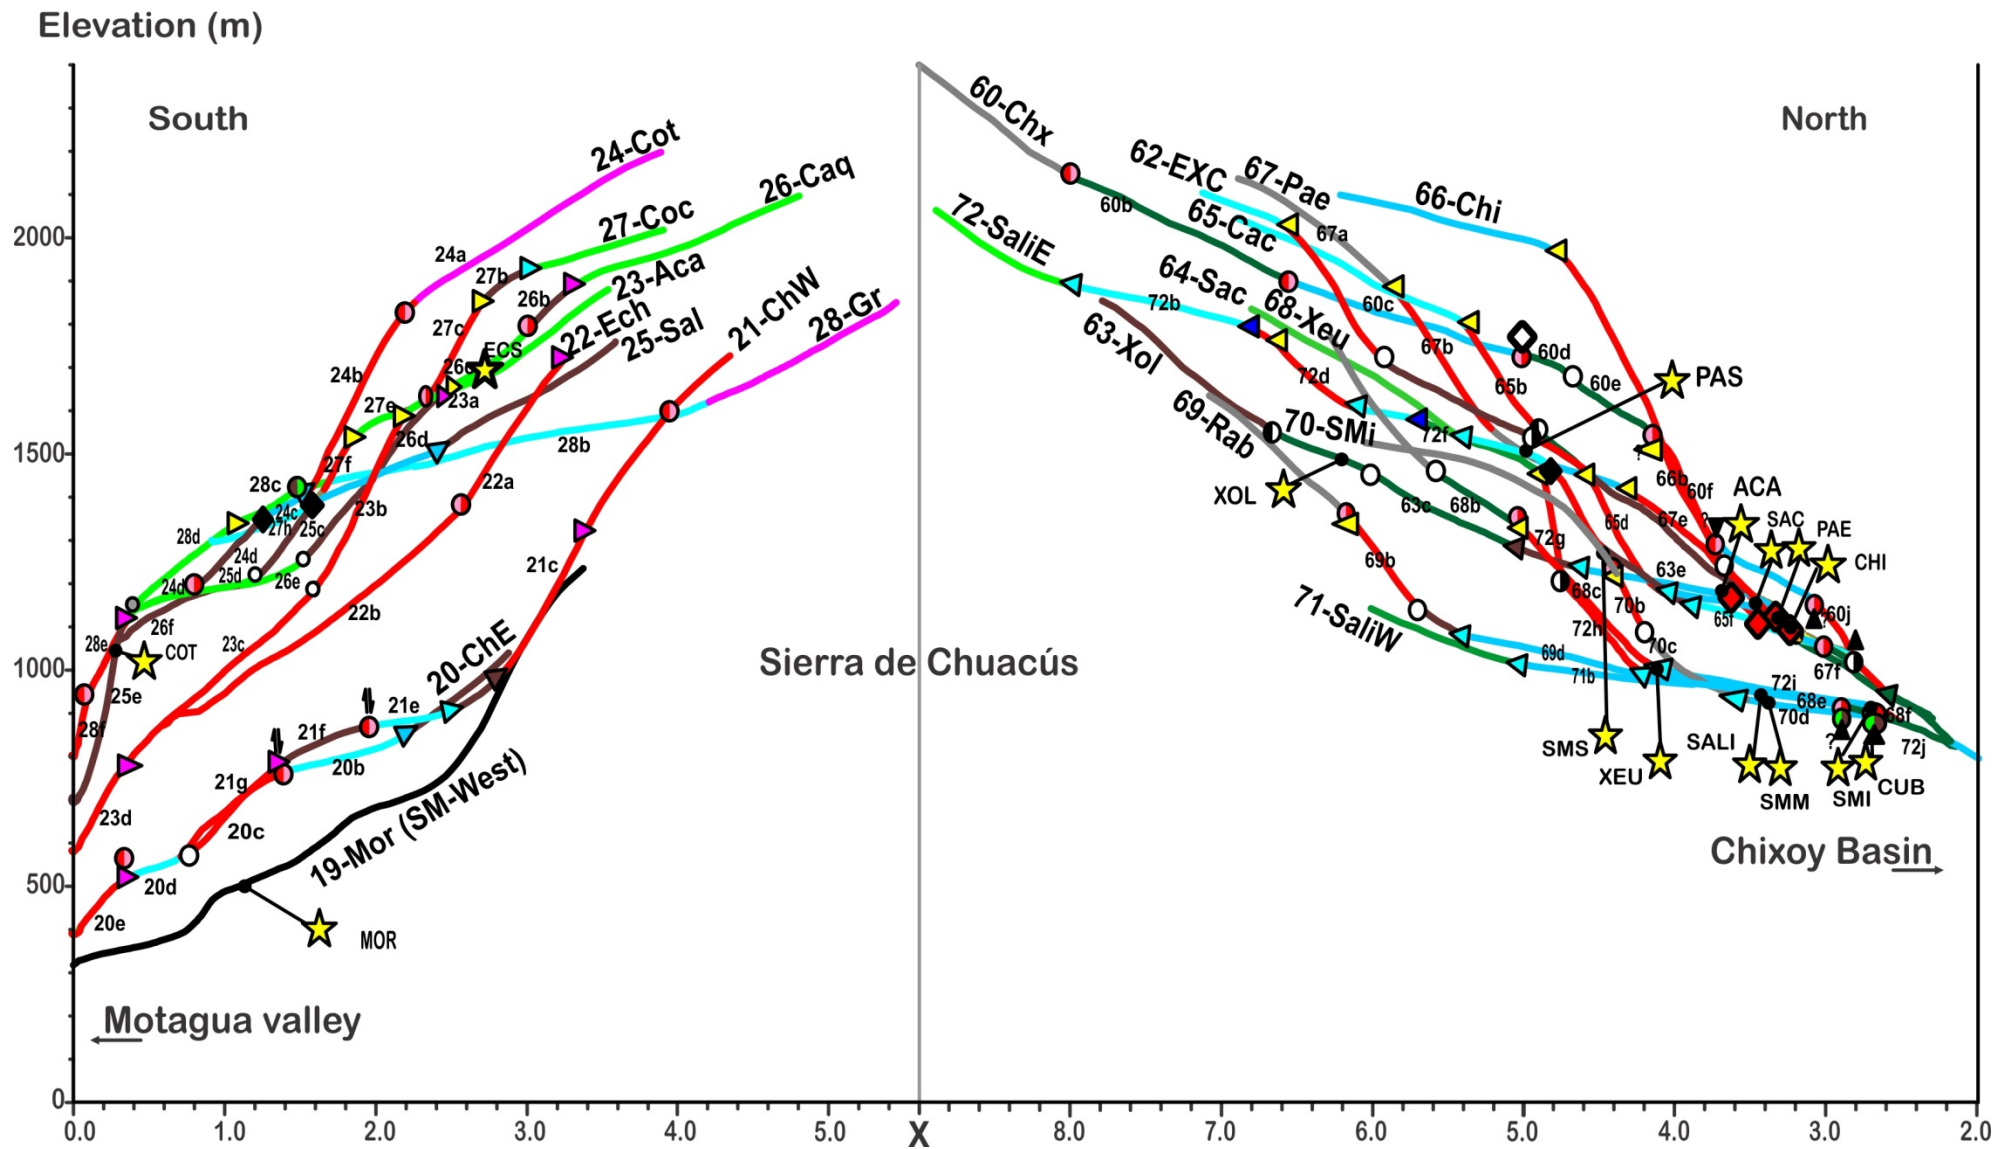

**Figure S4-4.  $\chi$ -plot of streams draining the Sierra de Chuacús.**

Stream names: Southern flank: 20-ChE: Chuacús East, 21-ChW: Chuacús west, 22-ECh: El Chol, 23-Aca: Agua Caliente, 24-Cot: Cotón, 25-Sal: Saltán, 26-Caq: Caquíl, 27- Coc: Cocol, 28-Gr: Grande. Northern flank: 72-SaliE: Salamá East, 71-SaliW: Salamá West, 70-SMi: San Miguel, 69-Rab: Rabinal, 68-Xeu: Xeul, 67-Pae: Pagueza, 66-Chi: Chiabalam-Yerbabuena, 65-Cac: Cacúj, 64-Sac: Sacaj, 63-Xol: Xoljá, 62-EXC: Ekca-Xecam-Chilil, 61: Cuc: Cucul, 60-Chx: Chixóy. Yellow stars: sampling sites for detrital  $^{10}\text{Be}$  erosion rate measurements.



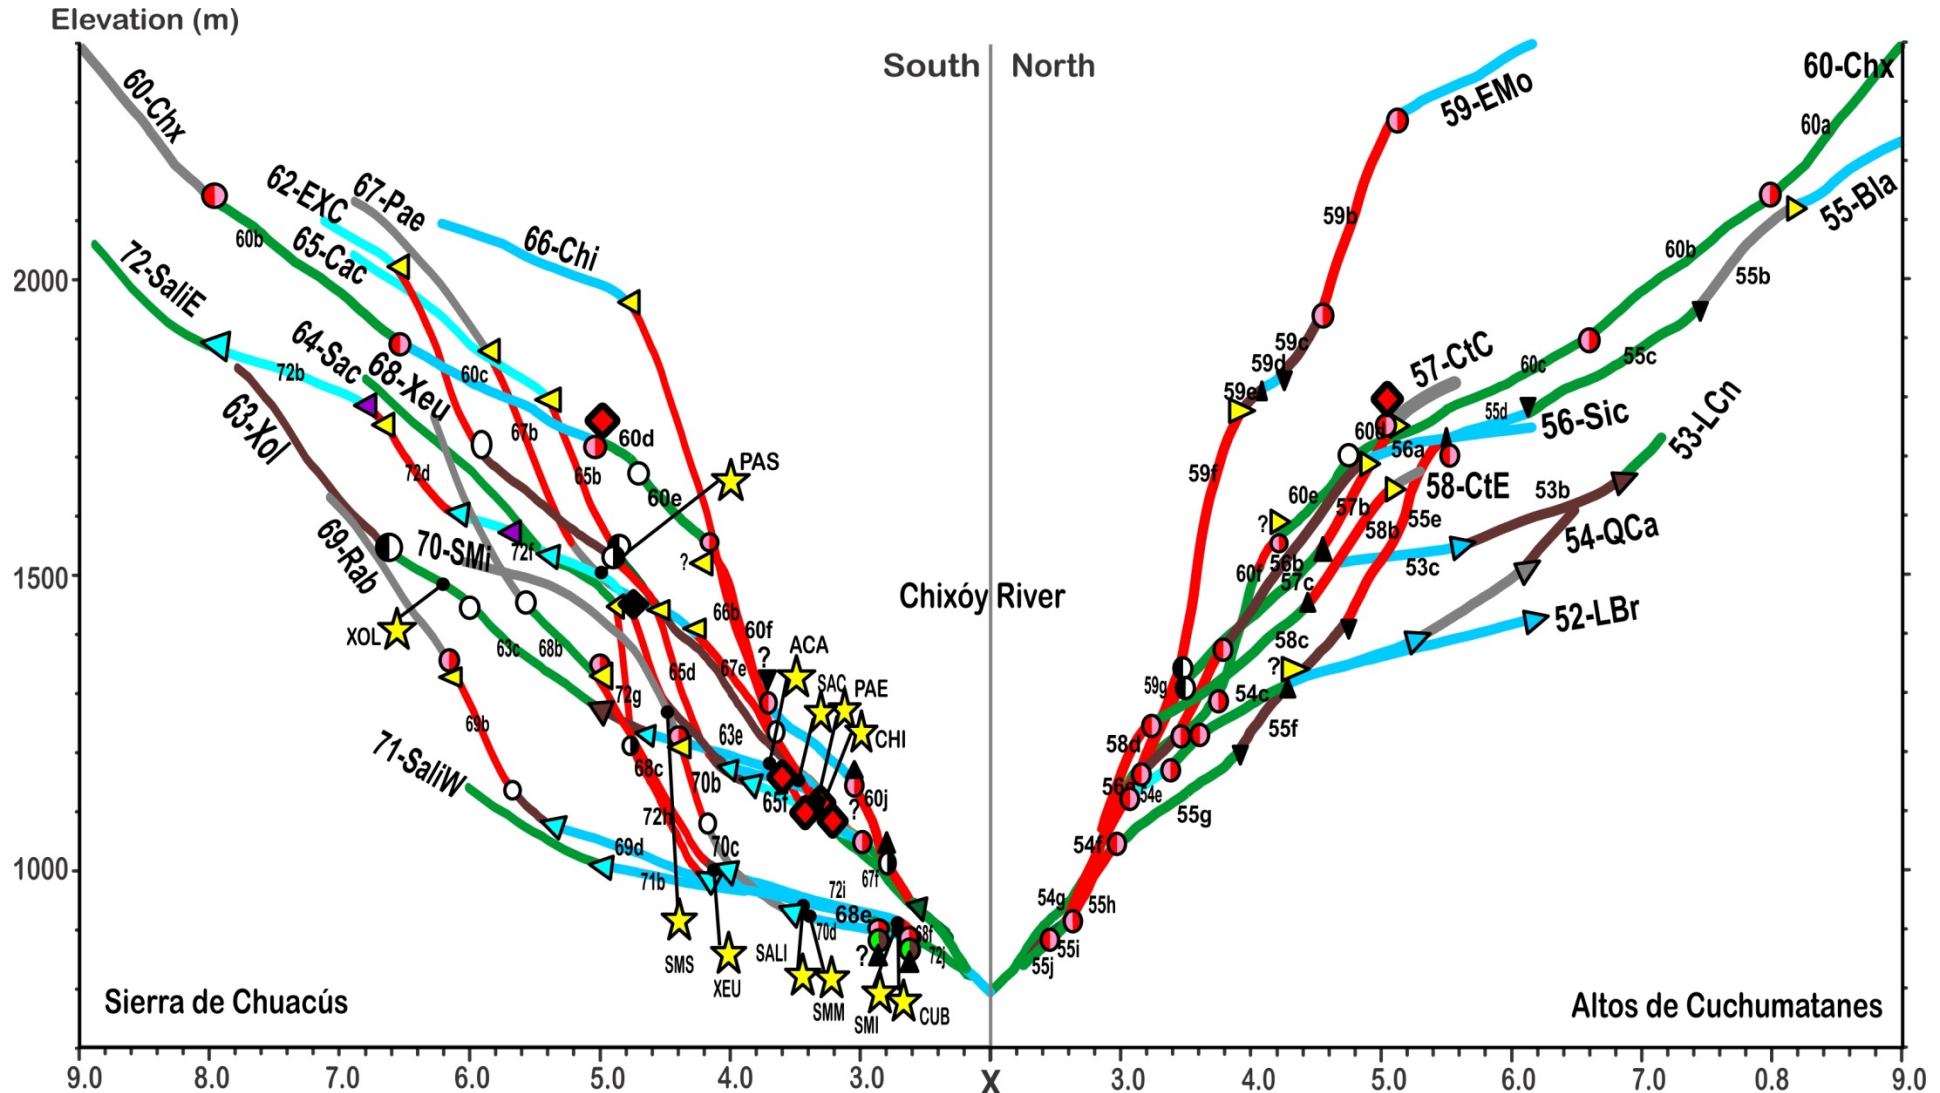

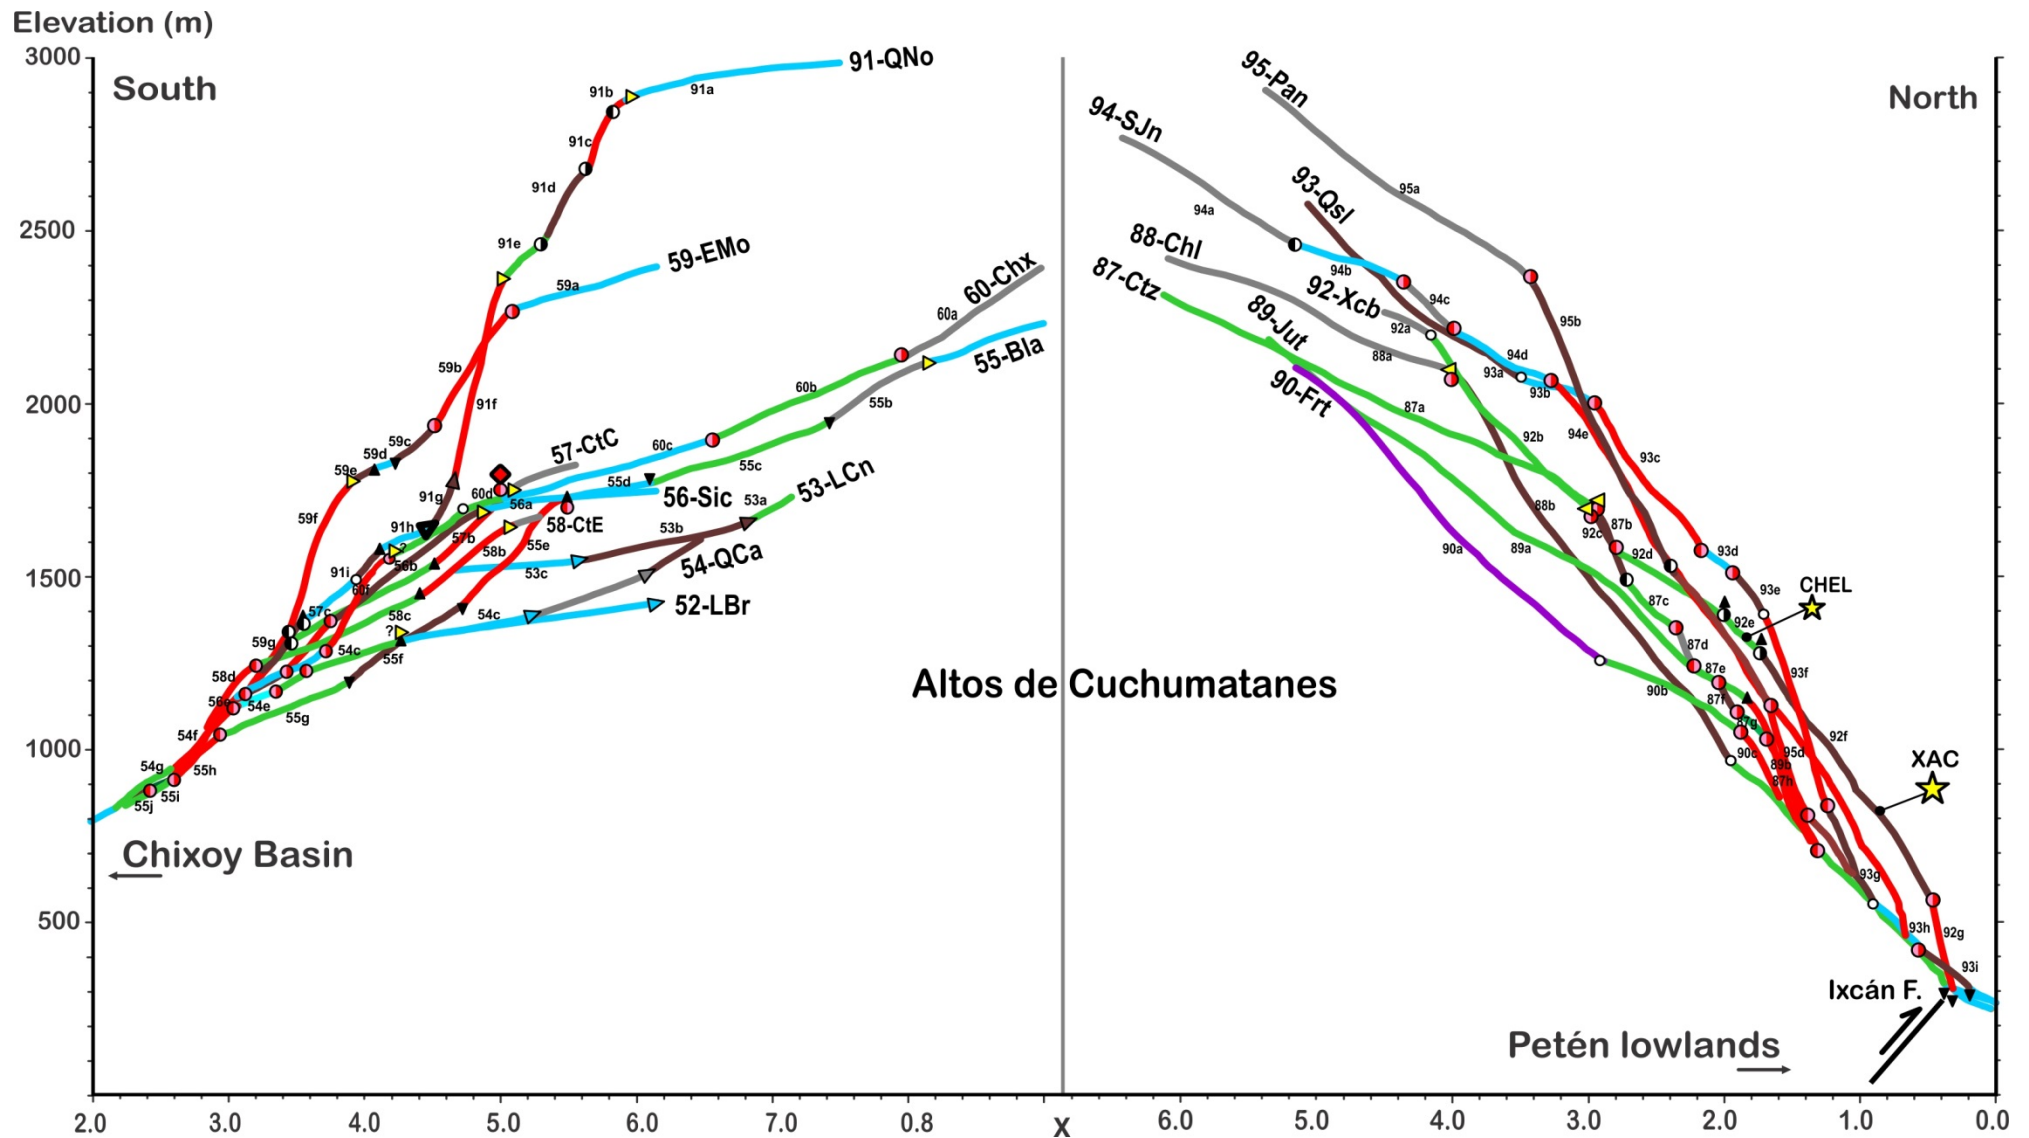

**Figure S4-6.  $\chi$ -plot of streams draining the Altos de Cuchumatanes along a N-S transect**

Stream names: Southern flank: 52-LBr: Las Barras, 53-LCa: Las Canoas, 54-QCa: Quililá-Carchela, 55-Bla: Blanco, 56-Sic: Sicaché, 57-CtC: Chitapol Centre, 58- CtE: Chitapol East, 59-EMo: El Molino 60-Chx: Chixóy.

Northern flank: 87-Ctz: Cotzal, 88-Chl: Chel, 89-Jut: El Jute, 90-Frt: unnamed frontal stream, 91- QNo: Quilén Novillo, 92- Xcb: Xacbal, 93- Qsl: Quisil, 94-SJn: San Juan, 95- Pan: Panila. Yellow stars: sampling sites for detrital  $^{10}\text{Be}$  erosion rate measurements.

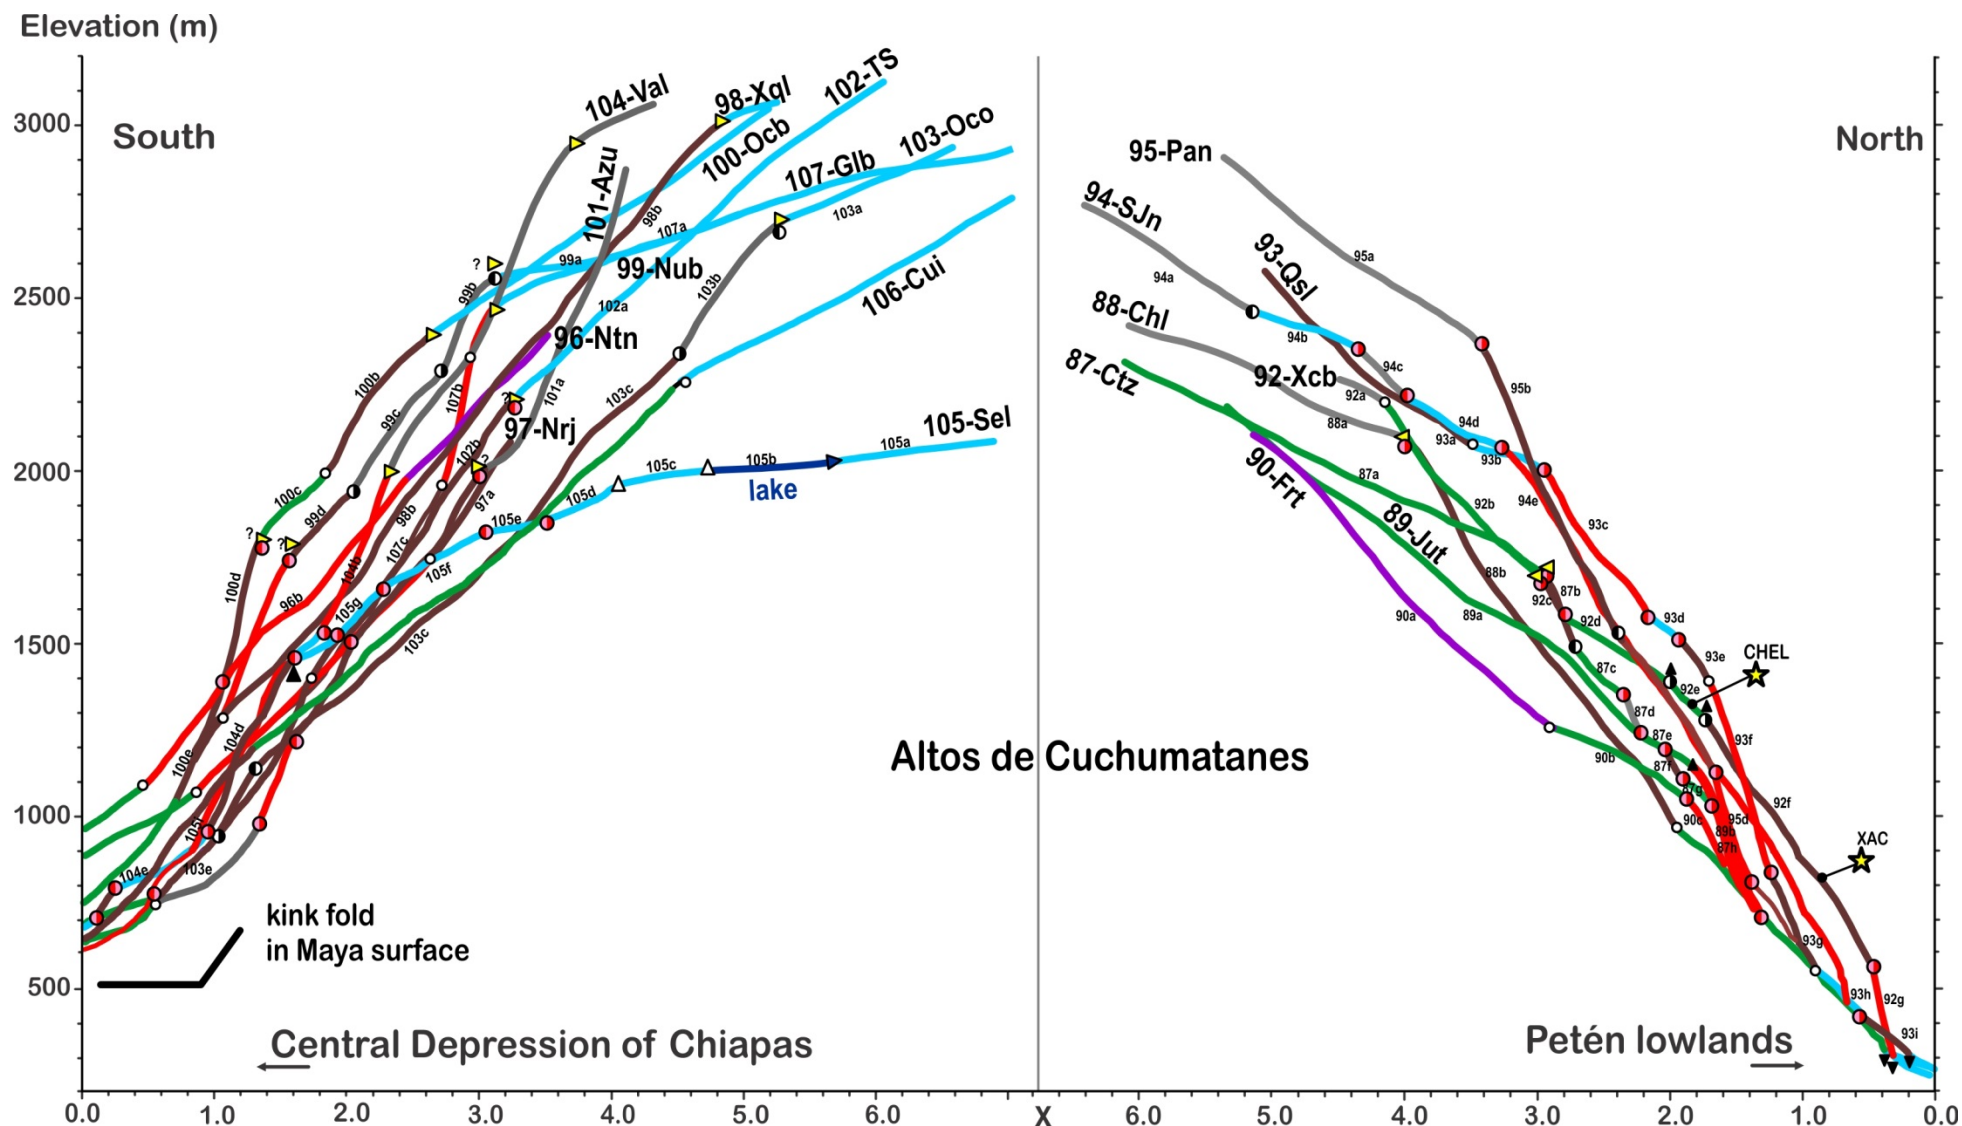

**Figure S4-7.  $\chi$ -plot of streams draining the Altos de Cuchumatanes along an W-E transect**

Stream names: Northern flank: 87-Ctz: Cotzal, 88-Chl: Chel, 89-Jut: El Jute, 90-Frt: unnamed frontal stream, 91- QNo: Quilén Novillo, 92- Xcb: Xacbal, 93- Qsl: Quisil, 94-SJn: San Juan, 95- Pan: Panila.

Eastern flank: 96-Ntn: Nenton, 97- Nrj: Naranjo, 98- Xql: Xoquíl, 99-Nub: Nubila, 100-Ocb: Ochebal-Catarina, 101-Azu: Azul, 102-TS: Todos Santos, 103-Oco: Ocho, 104-Val: Valparaíso, 105-Sel: Selegua, 106-Cui: Cuilco. Yellow stars: sampling sites for detrital  $^{10}\text{Be}$  erosion rate measurements.
